# Supplementary material for: Lysophosphatidylserine induces necrosis in pressure overloaded male mouse hearts via G protein coupled receptor 34
Source: PubMed Central journal article supplement (PMC10390482; doi:10.1038/s41467-023-40201-4), 2023-07-31
Supplement: 41467_2023_40201_MOESM1_ESM.pdf [file 41467_2023_40201_MOESM1_ESM.pdf]

**Supplementary information for the manuscript entitled:**

**Lysophosphatidylserine induces necrosis in pressure overloaded male mouse hearts  
via G protein coupled receptor 34**

Ryuta Sugihara et al.

- Supplementary figures (1-8)
- Supplementary Tables (1-4)
- Minimal checklist of lipidomics analysis
- Uncropped scans of blots in supplementary figures (supplementary figure 1, 2 and 7)

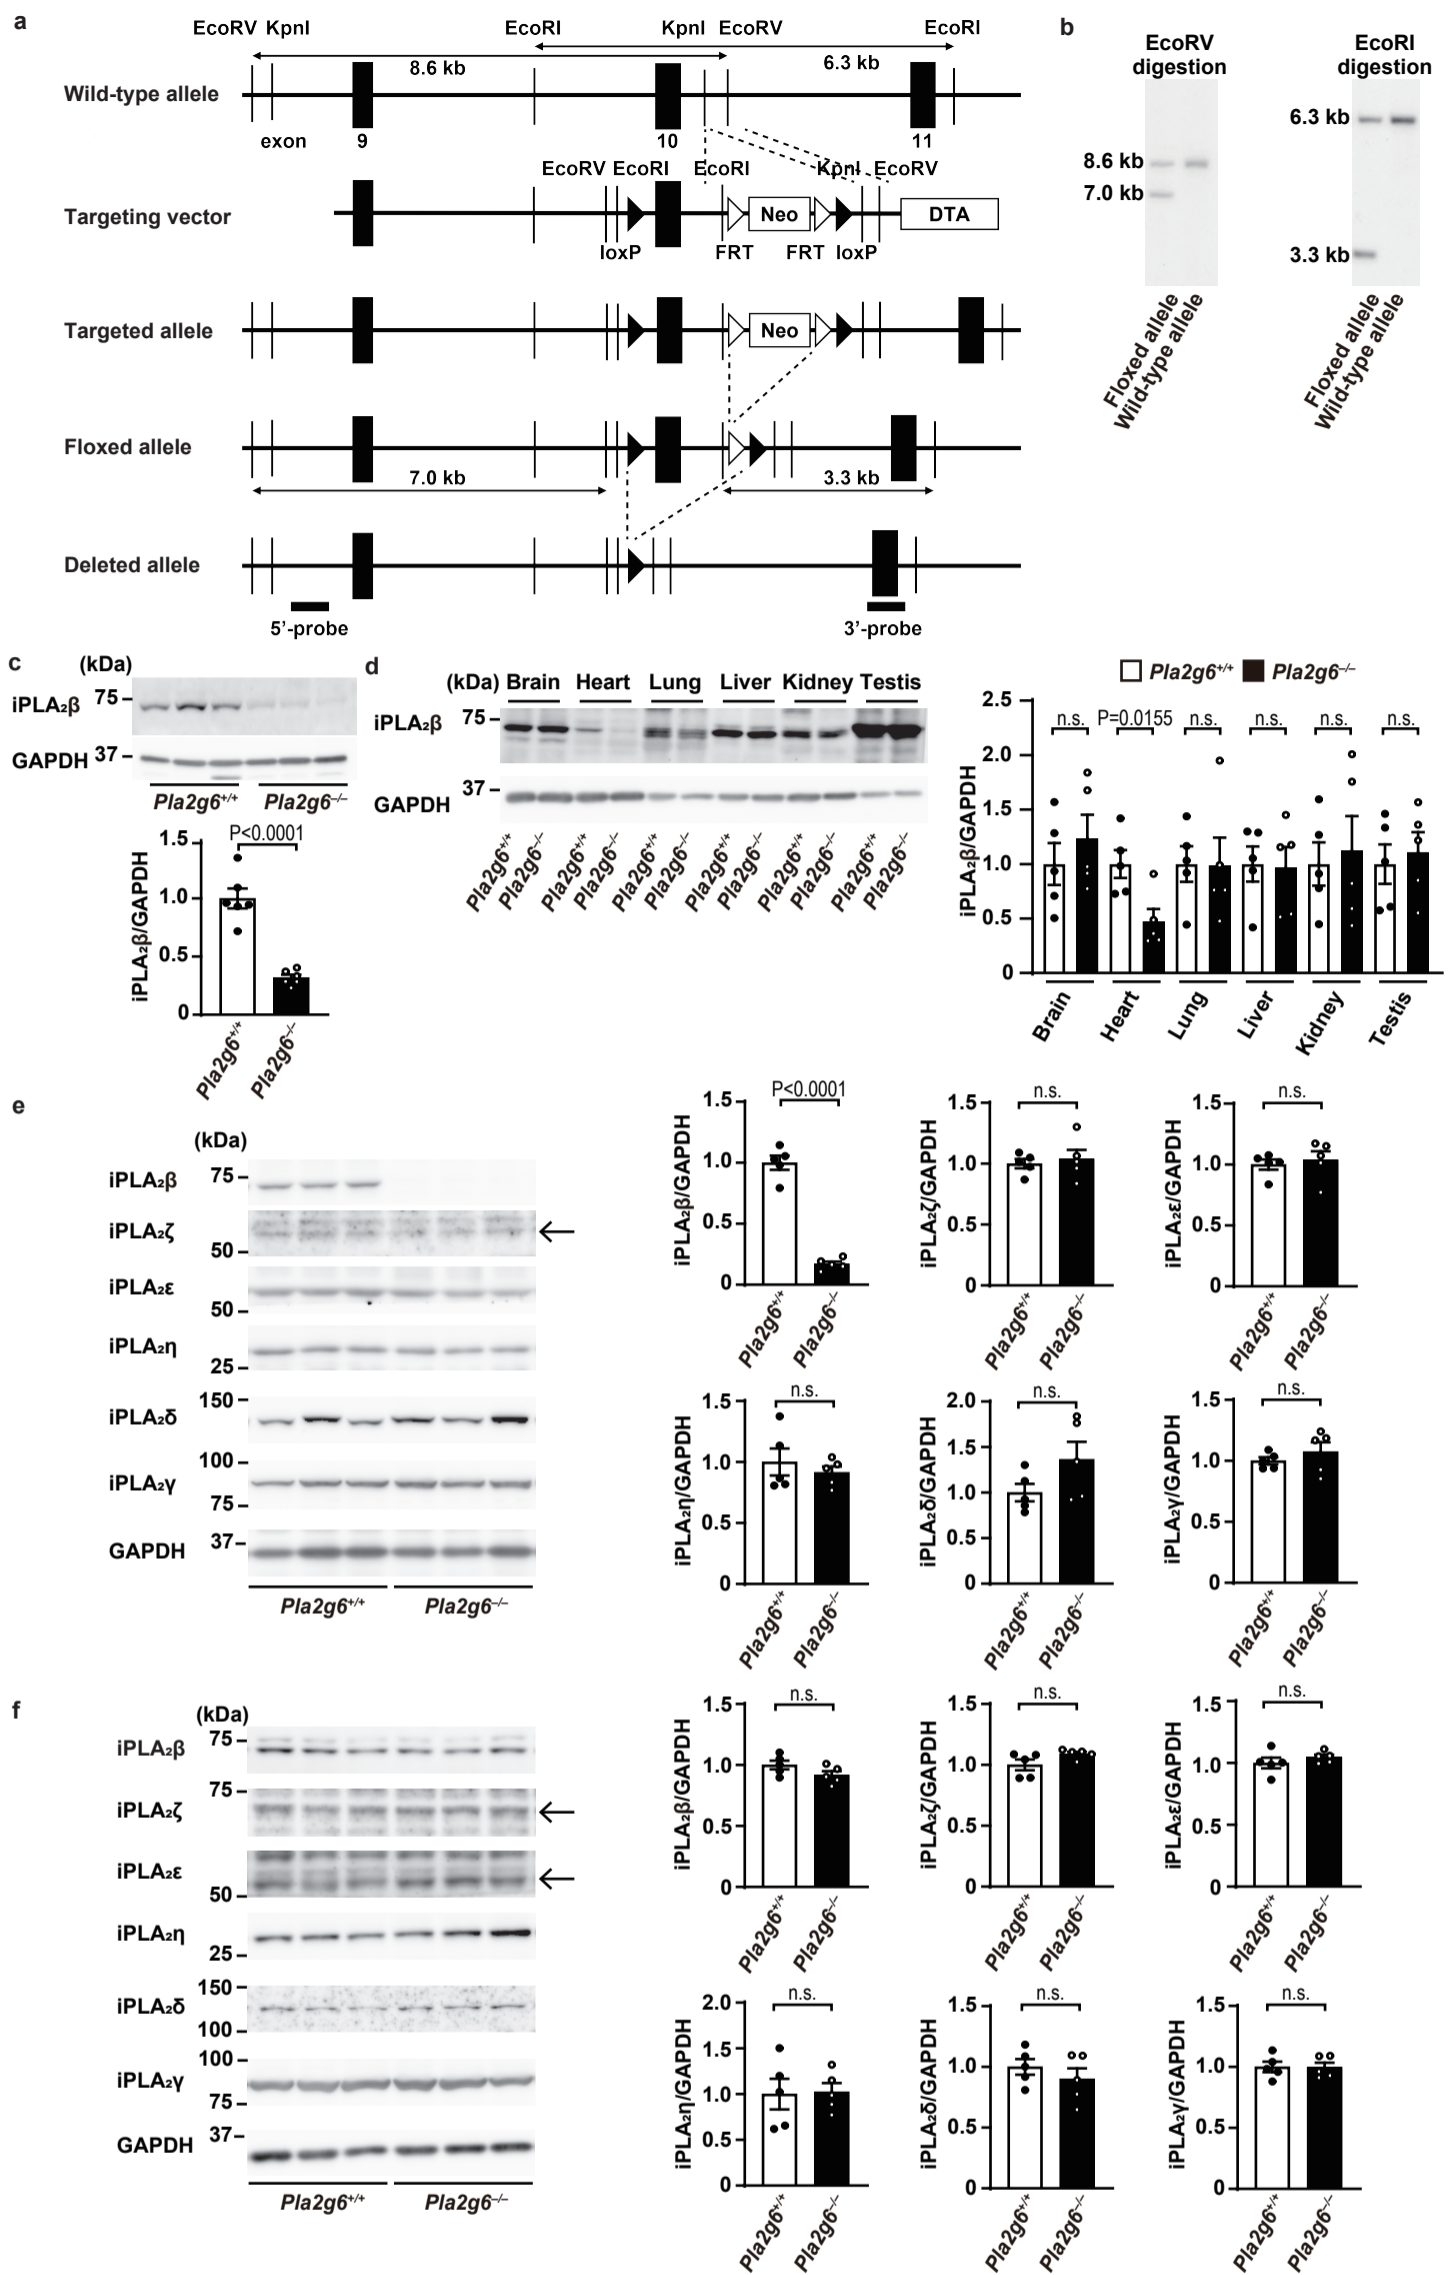

**Supplementary Fig. 1: Generation of cardiomyocyte-specific iPLA<sub>2</sub>β-deficient mice.**

**a** Targeted modification of the *Pla2g6* gene. Schematic structures of the wild-type genomic *Pla2g6* allele, the targeting vector, the targeted allele, the floxed allele after flippase recognition target site (*FRT*)-mediated deletion of neomycin-resistance gene (*Neo*), and the deleted allele after *Cre*-mediated recombination are indicated from top to bottom. The black and white arrowheads indicate *loxP* and *FRT* sites, respectively. The neomycin resistance gene (*PGK-Neo* cassette) was inserted between exon ten and the downstream *loxP* site. The diphtheria toxin A (*DTA*) gene was positioned at the 3' end of the targeting vector for negative selection. The bar labelled 'probe' corresponds to the sequence used for southern blotting. **b** Genomic analysis of embryonic stem (ES) cells. To identify homologous recombinants, genomic DNA extracted from ES cells was digested with *EcoRV* or *EcoRI*, and analyzed by southern blotting with the 5' or 3' probe, respectively. Representative images show floxed and wild-type alleles using the 5' probe after *EcoRV* digestion (left) or using the 3' probe after *EcoRI* digestion (right). The data are representative of at least nine biologically independent samples. The ES cells with the *Pla2g6*-floxed allele were injected into blastocysts to obtain floxed *Pla2g6* mice. **c** Protein expression levels of iPLA<sub>2</sub>β in *Pla2g6*<sup>+/+</sup> and *Pla2g6*<sup>-/-</sup> cardiomyocytes. Isolated adult cardiomyocyte lysates from *Pla2g6*<sup>+/+</sup> and *Pla2g6*<sup>-/-</sup> mice were analyzed by western blotting with anti-iPLA<sub>2</sub>β antibody. Densitometric analysis is shown in the bottom panel ( $n = 6$ , biologically independent samples,  $P = 0.00002$ ). The average value of iPLA<sub>2</sub>β/GAPDH in *Pla2g6*<sup>+/+</sup> was set equal to 1. The samples derived from the same experiment and blots were processed in parallel. **d** Protein expression levels of iPLA<sub>2</sub>β in multiple tissues. Tissue homogenates from *Pla2g6*<sup>+/+</sup> and *Pla2g6*<sup>-/-</sup> mice were analyzed by western blotting with anti-iPLA<sub>2</sub>β antibody. Densitometric analysis is shown in the right panel ( $n = 5$ , biologically independent samples). The average value of iPLA<sub>2</sub>β/GAPDH in each tissue in *Pla2g6*<sup>+/+</sup> was set equal to 1. The samples derived from the same experiment and blots were processed in parallel. **e** Protein expression levels of iPLA<sub>2</sub> subtypes in *Pla2g6*<sup>+/+</sup> and *Pla2g6*<sup>-/-</sup> mouse cardiomyocytes. Isolated adult cardiomyocyte lysates from *Pla2g6*<sup>+/+</sup> and *Pla2g6*<sup>-/-</sup> mice were analyzed by western blotting using the indicated antibodies. Densitometric analysis is shown in the right panel ( $n = 5$ , biologically independent samples,  $P = 0.0000009$  in iPLA<sub>2</sub>β/GAPDH). GAPDH was used as sample processing controls. The samples derived from the same experiment and blots were processed in parallel. **f** Protein expression levels of iPLA<sub>2</sub> subtypes in *Pla2g6*<sup>+/+</sup> and *Pla2g6*<sup>-/-</sup> non-cardiomyocytes. Isolated adult non-cardiomyocyte lysates from *Pla2g6*<sup>+/+</sup> and *Pla2g6*<sup>-/-</sup> mice were analyzed by western blotting using the indicated antibodies. Densitometric analysis is shown in the right panel ( $n = 5$ , biologically independent samples). GAPDH was used as sample processing controls. The samples derived from the same experiment and blots were processed in parallel. The values are presented as the mean  $\pm$  SEM. The average value of the indicated iPLA<sub>2</sub> subtypes in *Pla2g6*<sup>+/+</sup> was set equal to 1. The data were evaluated using two-sided unpaired Student's *t*-test. Source data are provided as a Source Data file.

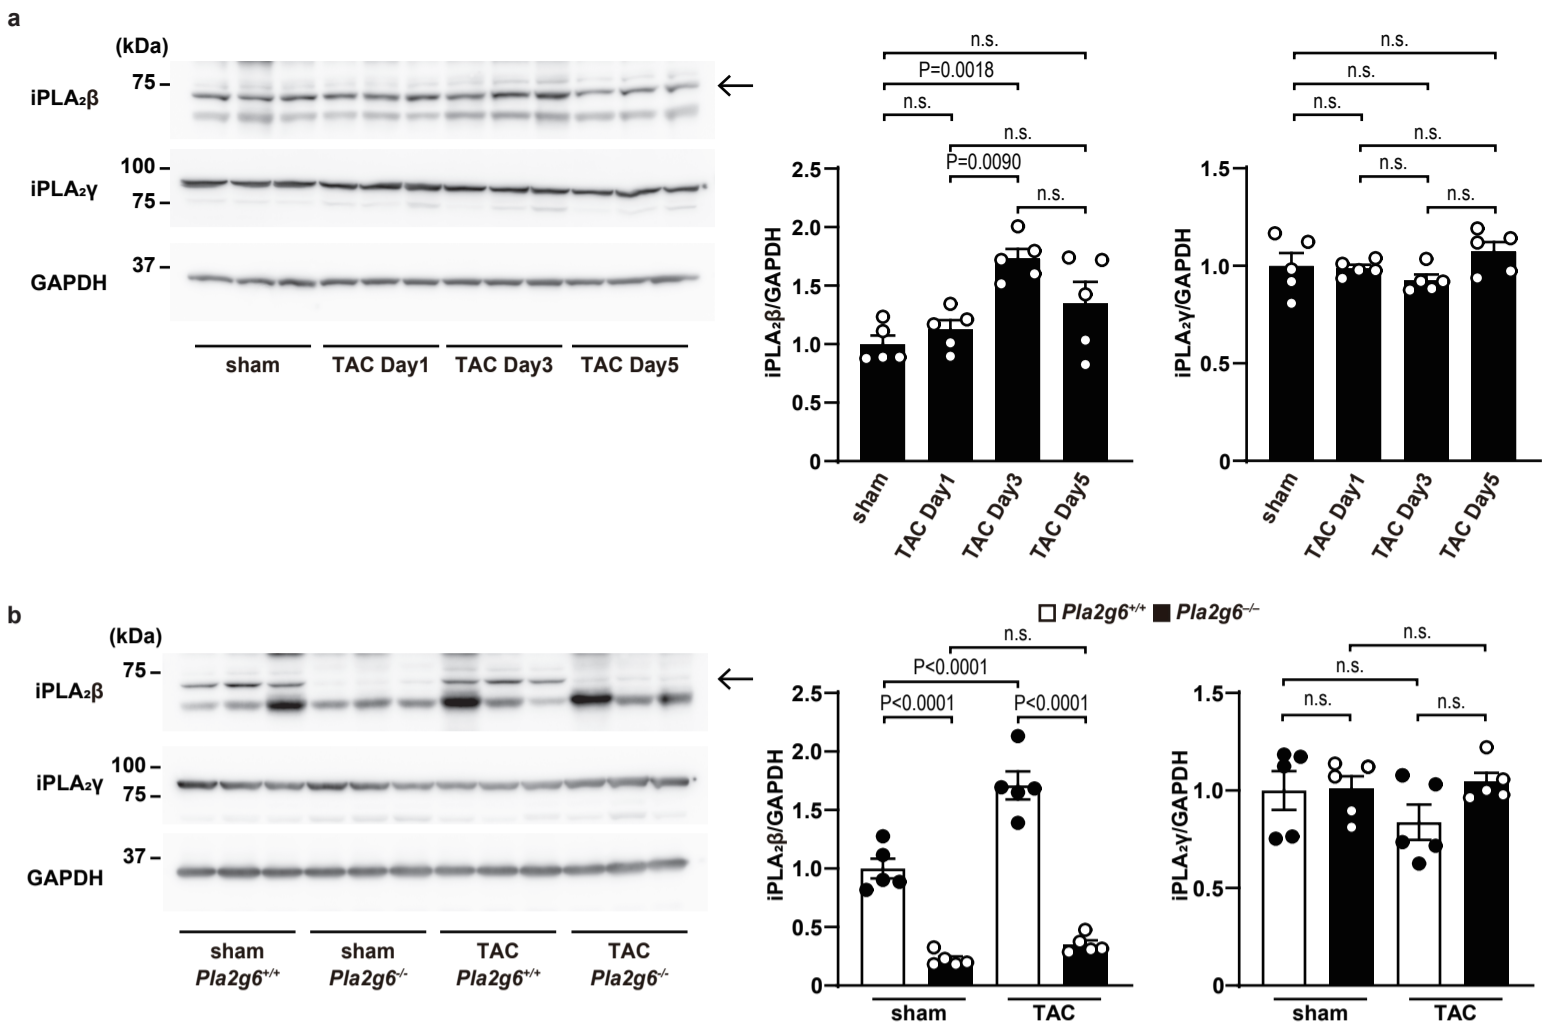

**Supplementary Fig. 2: Protein expression level of iPLA<sub>2</sub>β and iPLA<sub>2</sub>γ after TAC operation.**

**a** Time course of protein expression levels of iPLA<sub>2</sub>β and iPLA<sub>2</sub>γ after TAC operation in wild-type C57BL/6J mouse hearts. **b** Protein expression levels of iPLA<sub>2</sub>β and iPLA<sub>2</sub>γ 3 days after TAC operation in *Pla2g6*<sup>+/+</sup> and *Pla2g6*<sup>-/-</sup> hearts. *n* = 5, biologically independent samples for each experiment. Densitometric analysis is shown in the right panels. Open and closed bars indicate *Pla2g6*<sup>+/+</sup> and *Pla2g6*<sup>-/-</sup> mice, respectively (**b**). The values are presented as the mean ± SEM. The average value of the indicated iPLA<sub>2</sub> subtypes in sham group or sham-operated *Pla2g6*<sup>+/+</sup> group was set equal to 1. The data were evaluated by one-way ANOVA, followed by Tukey-Kramer's *post-hoc* test (Sham *Pla2g6*<sup>+/+</sup> versus sham *Pla2g6*<sup>-/-</sup> *P*=0.00001, sham *Pla2g6*<sup>+/+</sup> versus TAC *Pla2g6*<sup>+/+</sup> *P*=0.00004, TAC *Pla2g6*<sup>+/+</sup> versus TAC *Pla2g6*<sup>-/-</sup> *P*=0.000000006 in iPLA<sub>2</sub>β/GAPDH, **b**). GAPDH was used as sample processing controls. The samples derived from the same experiment and blots were processed in parallel. Source data are provided as a Source Data file.

Fold change (Log2)

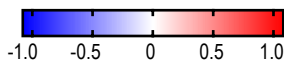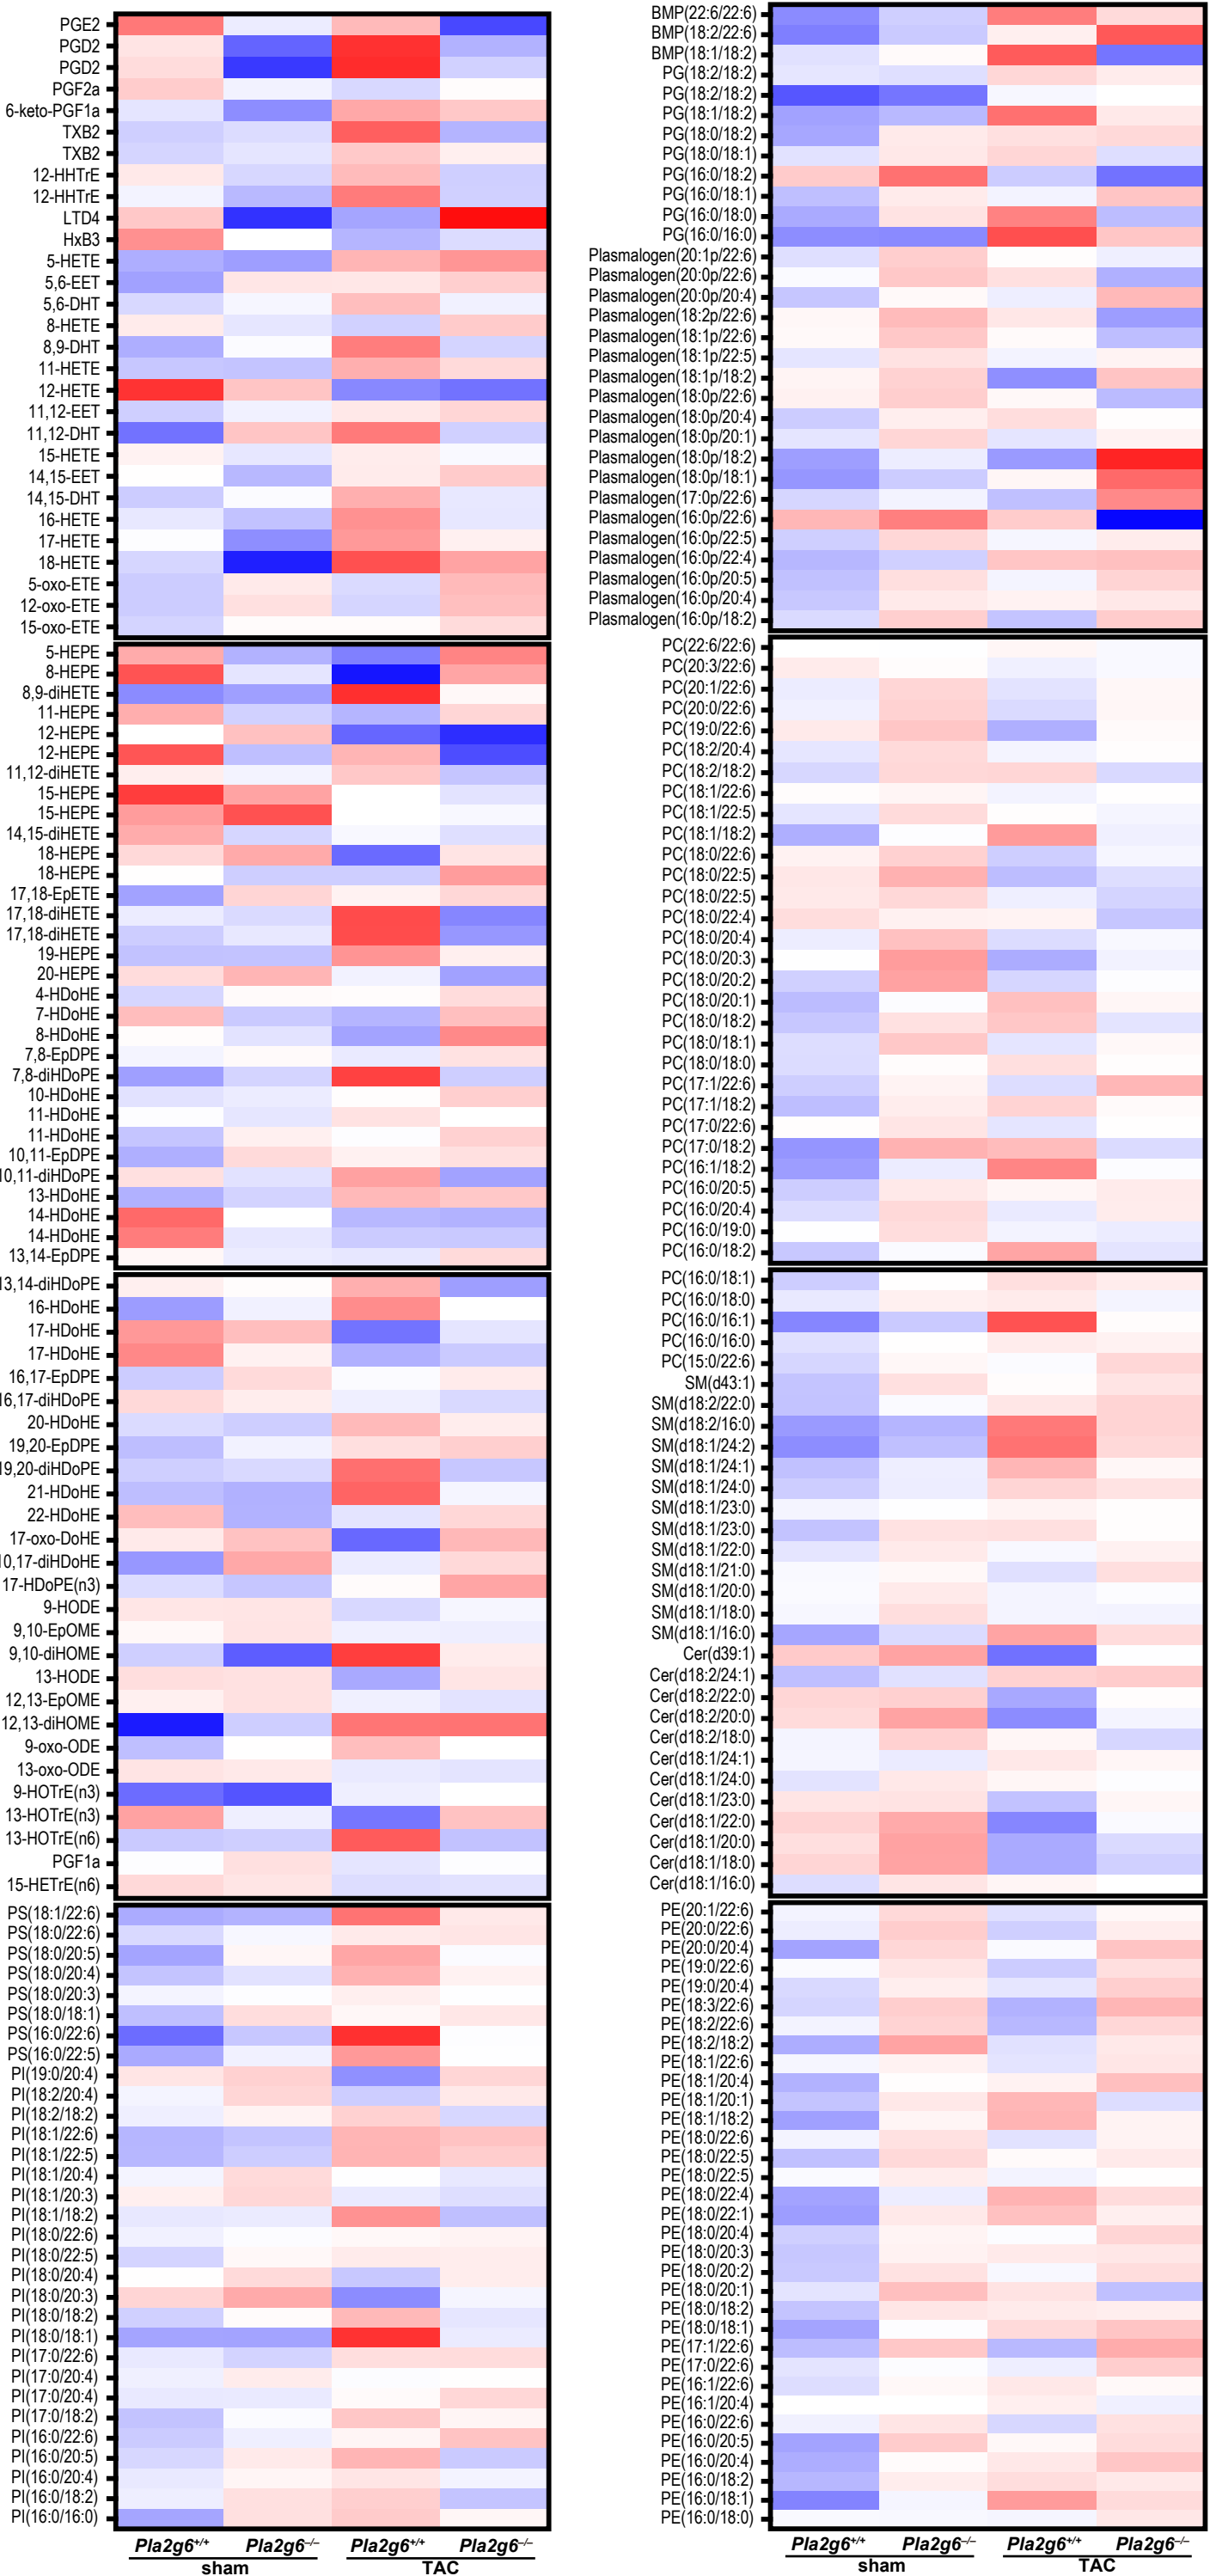

**Supplementary Fig. 3: Untargeted and targeted lipidomic analysis in TAC-operated *Pla2g6*<sup>-/-</sup> heart tissue.**

Heat map showing the mean contents of molecular species including arachidonic acid metabolites in the hearts of mice after TAC operation ( $n = 5$ , biologically independent samples). Correlation of peak values and color are indicated at the top; High, red and low, blue. PGE, prostaglandin E; PGD, prostaglandin D; PGF, prostaglandin F; TXB, thromboxane B; HHTrE, hydroxyheptadecatrienoic acid; LTD, leukotriene D; HxB, hepxilin B; HETE, hydroxyeicosatetraenoic acid; EET, epoxyeicosatrienoic acid; DHT, dihydrotestosterone; oxo-ETE, oxo-eicosatetraenoic acid; HEPE, hydroxy/hydroperoxyeicosapentaenoic acid; diHETE, dihydroxyeicosatetraenoic acid; EpETE, epoxyeicosatetraenoic acid; HDoHE, hydroxydocosahexaenoic acid; EpDPE, epoxydocosapentaenoic acid; diHDoPE, dihydroxydocosapentaenoic acid; oxo-DoHE, oxo-docosahexaenoic acid; diHDoHE, dihydroxydocosahexaenoic acid; HDoPE, hydroxydocosapentaenoic acid; HODE, hydroxyoctadecadienoic acid; EpOME, epoxyoctadecenoic acid; diHOME, dihydroxyoctadecenoic acid; oxo-ODE, oxo-octadecadienoic acid; HOTrE, hydroxyoctadecatrienoic acid; HETrE, hydroxyeicosatrienoic acid; PS, phosphatidylserine; PI, phosphatidylinositol; BMP, bis(monoacylglycerol)-phosphate; PG, phosphatidylglycerol; PC, phosphatidylcholine; SM, sphingomyelin; Cer, ceramide; PE, phosphatidylethanolamine.

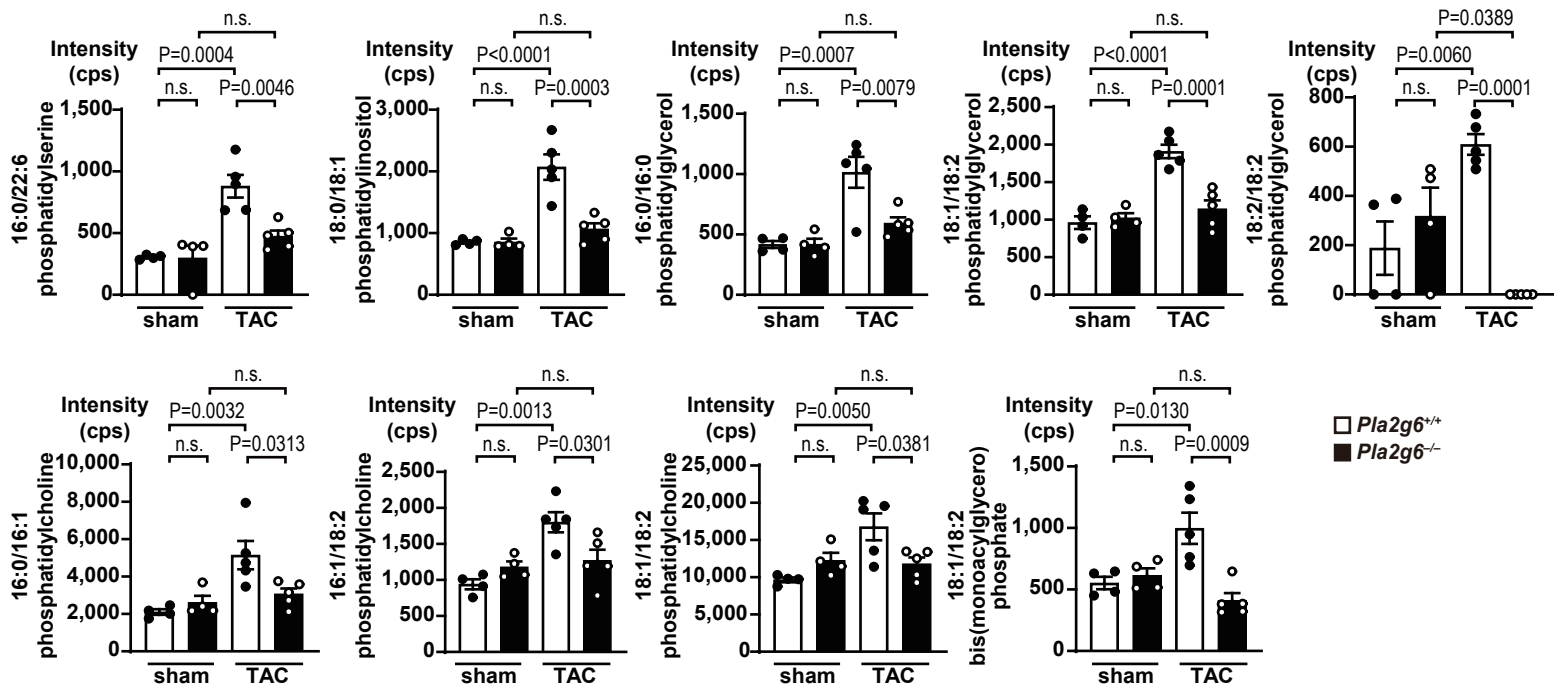

**Supplementary Fig. 4: Quantity of lipid mediator candidates in mouse hearts after TAC operation.**

Quantity of lipid mediator candidates in mouse hearts after TAC operation.  $n = 4$  (sham-operated *Pla2g6*<sup>+/+</sup>), 4 (sham-operated *Pla2g6*<sup>-/-</sup>), 5 (TAC-operated *Pla2g6*<sup>+/+</sup>), and 5 (TAC-operated *Pla2g6*<sup>-/-</sup>). Open and closed bars indicate *Pla2g6*<sup>+/+</sup> and *Pla2g6*<sup>-/-</sup>, respectively. Data are expressed as the mean  $\pm$  SEM. The data were evaluated by one-way ANOVA, followed by Tukey-Kramer's *post-hoc* test (Sham *Pla2g6*<sup>+/+</sup> versus TAC *Pla2g6*<sup>+/+</sup>  $P=0.00006$  and  $P=0.00003$  in 18:0/18:1 phosphatidylinositol and 18:1/18:2 phosphatidylglycerol, respectively). Source data are provided as a Source Data file.

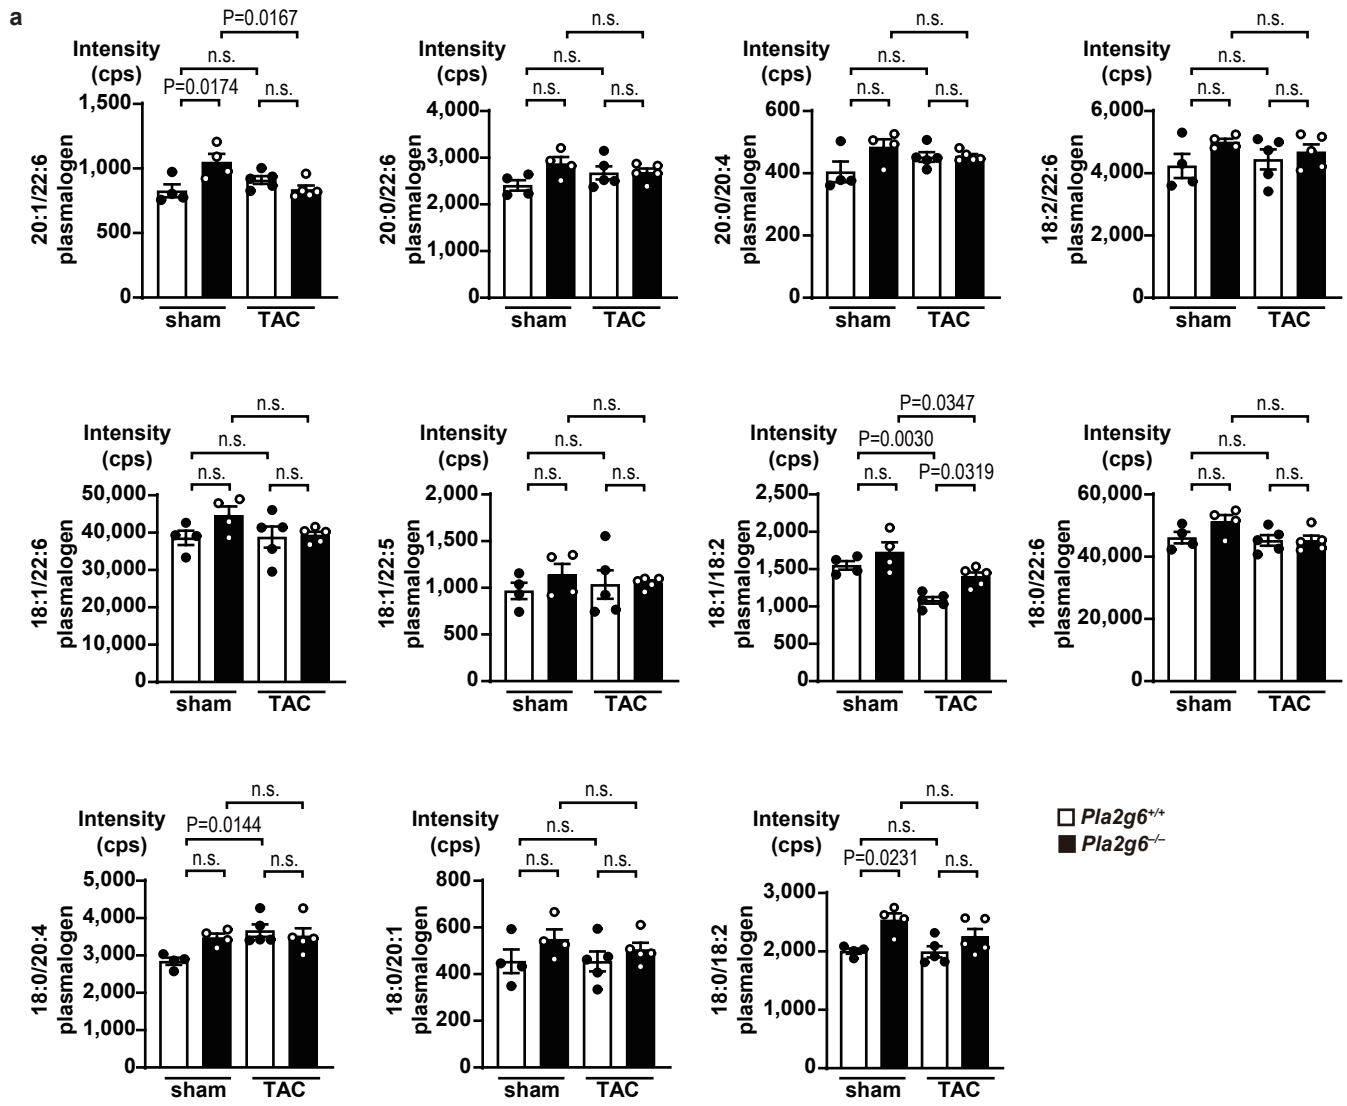

**Supplementary Fig. 5: Quantity of plasmalogens, 18:1 and 18:2 free fatty acid in mouse hearts after TAC operation.**

**a** Quantity of plasmalogens detected in mouse hearts after TAC operation. **b** Quantity of 18:1 and 18:2 free fatty acids, which are products derived from 18:1/18:2 plasmalogen.  $n = 4$  (sham-operated *Pla2g6*<sup>+/+</sup>), 4 (sham-operated *Pla2g6*<sup>-/-</sup>), 5 (TAC-operated *Pla2g6*<sup>+/+</sup>), and 5 (TAC-operated *Pla2g6*<sup>-/-</sup>), biologically independent samples. Open and closed bars indicate *Pla2g6*<sup>+/+</sup> and *Pla2g6*<sup>-/-</sup>, respectively. Data are expressed as the mean  $\pm$  SEM. The data were evaluated by one-way ANOVA, followed by Tukey-Kramer's *post-hoc* test. Source data are provided as a Source Data file.

a (Continued)

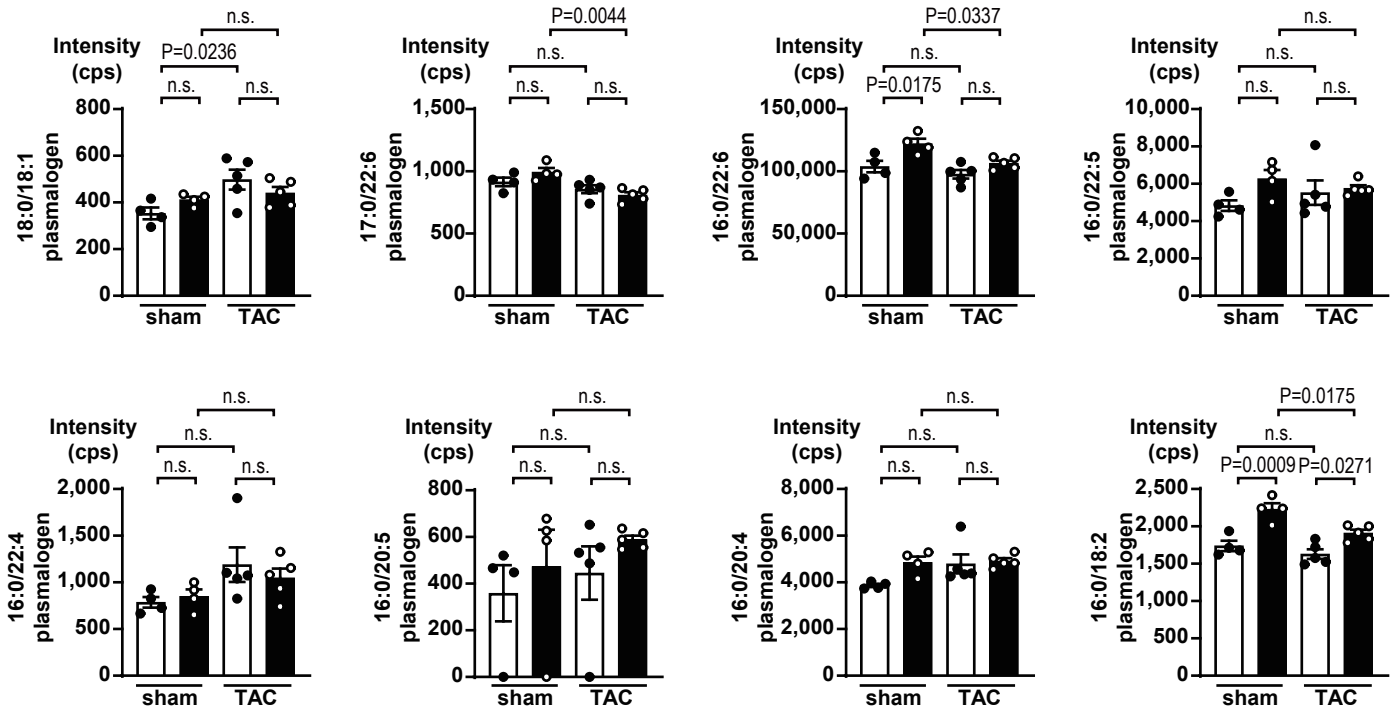

b

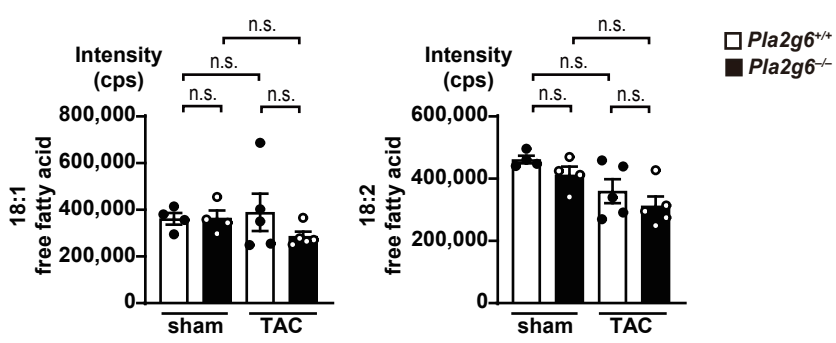

Supplementary Fig. 5 Continued

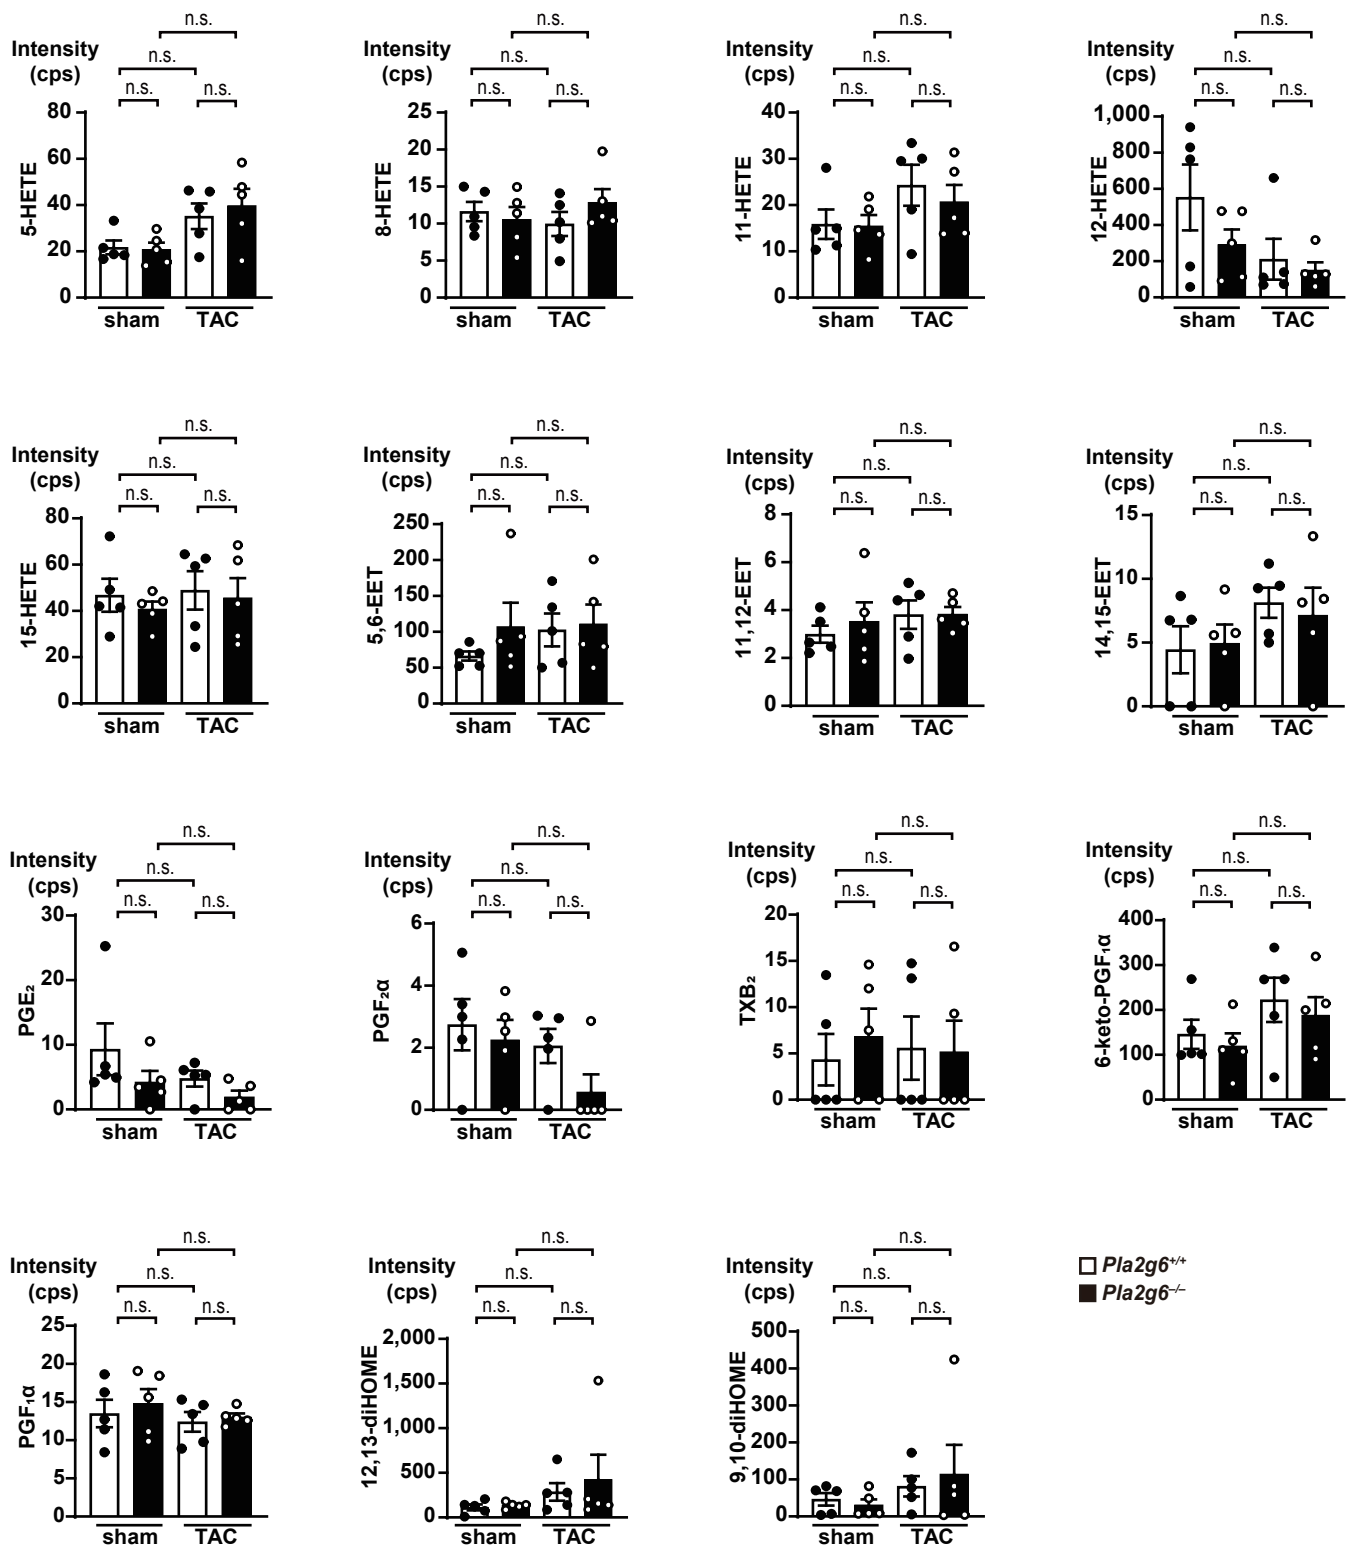

**Supplementary Fig. 6: Quantity of lipid mediators associated with iPLA<sub>2</sub>γ in mouse hearts after TAC operation.**

Quantity of lipid mediators associated with iPLA<sub>2</sub>γ in mouse hearts after TAC operation. HETE, hydroxyeicosatetraenoic acid; EET, epoxyeicosatrienoic acid; PGE, prostaglandin E; PGF, prostaglandin F; TXB, thromboxane B; diHOME, dihydroxyoctadecenoic acid; HODE, hydroxyoctadecadienoic acid; oxo-ODE, oxo-octadecadienoic acid; EpOME, epoxyoctadecenoic acid; DiHDPA, dihydroxydocosapentaenoic acid; HDoHE, hydroxydocosahexaenoic acid; *n* = 5 (sham-operated *Pla2g6*<sup>+/+</sup>), 5 (sham-operated *Pla2g6*<sup>-/-</sup>), 5 (TAC-operated *Pla2g6*<sup>+/+</sup>), and 5 (TAC-operated *Pla2g6*<sup>-/-</sup>), biologically independent samples. Open and closed bars indicate *Pla2g6*<sup>+/+</sup> and *Pla2g6*<sup>-/-</sup> hearts, respectively. Data are expressed as the mean ± SEM. The data were evaluated by one-way ANOVA, followed by Tukey-Kramer's *post-hoc* test. Source data are provided as a Source Data file.



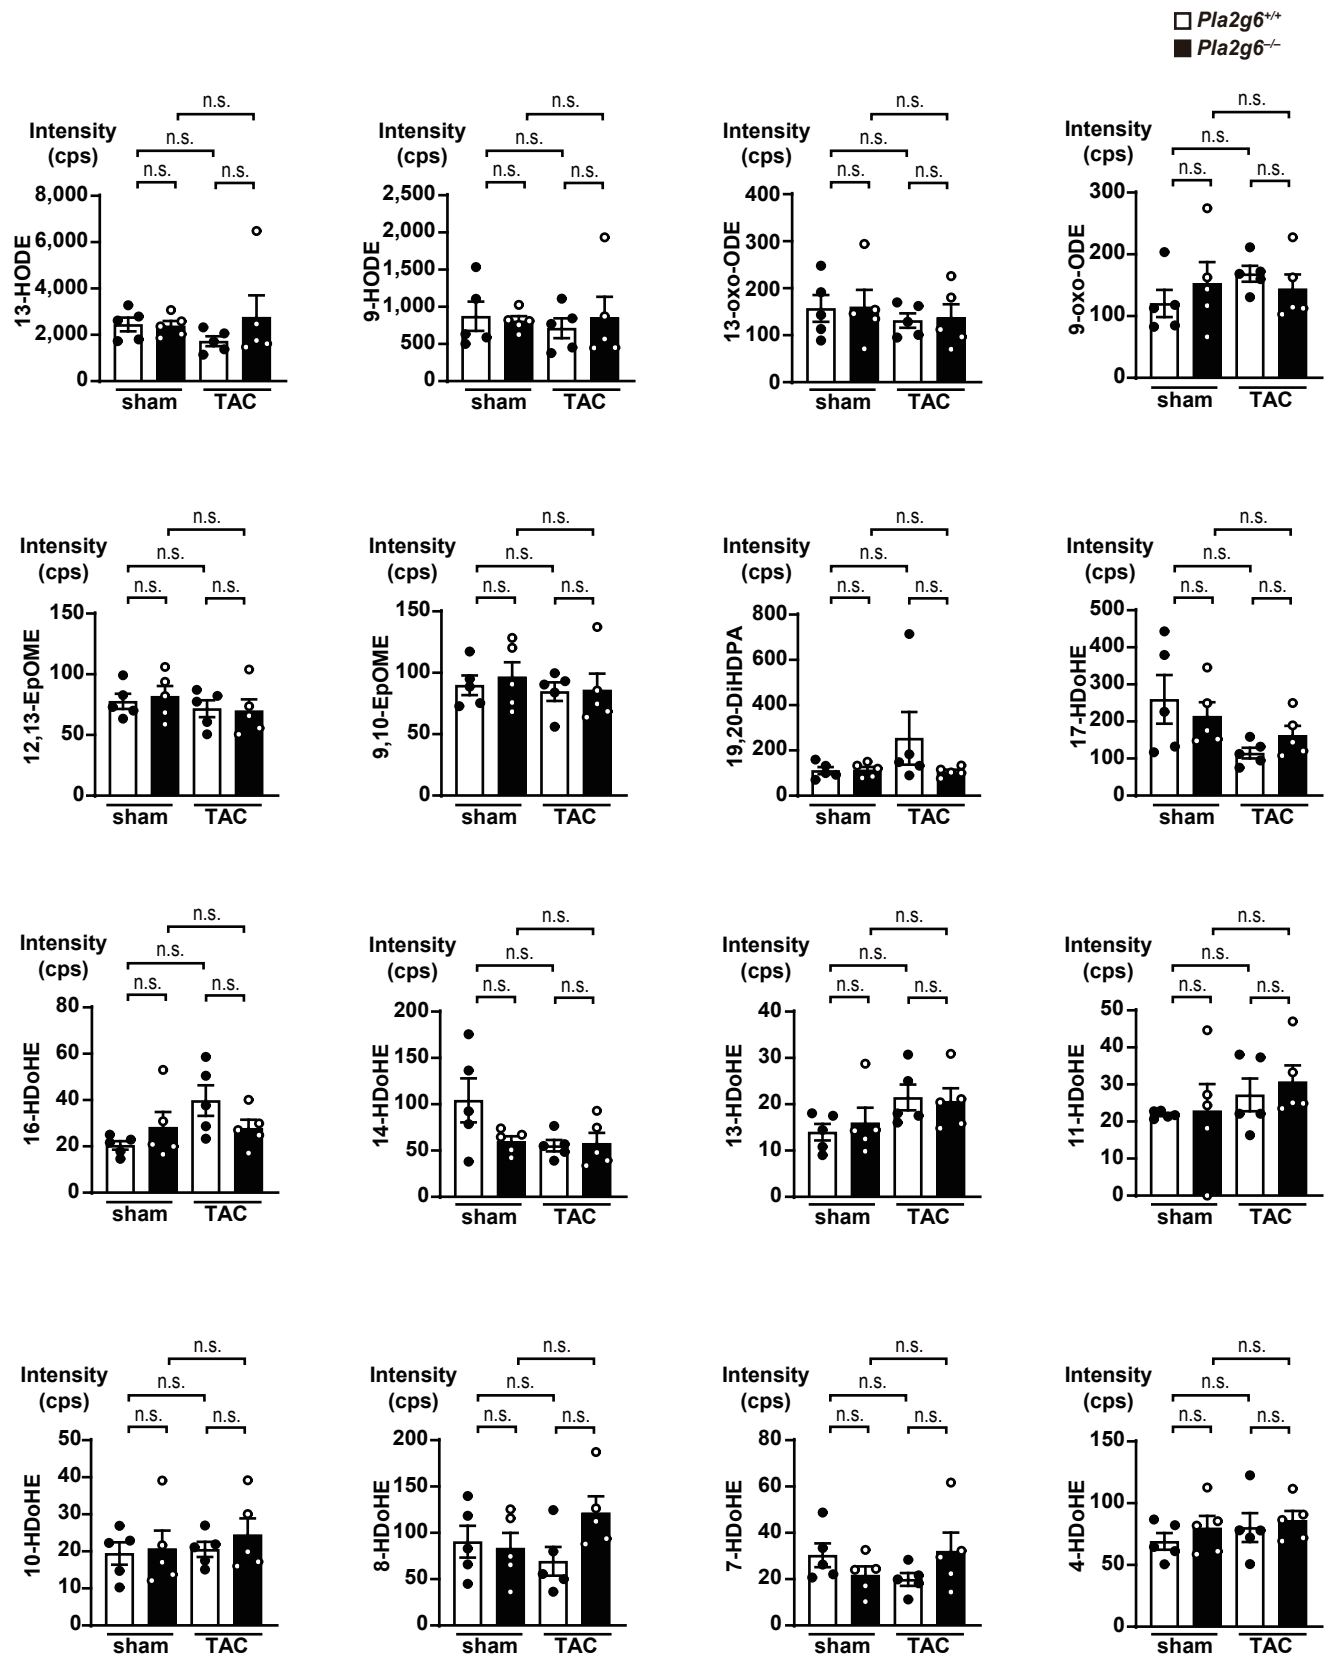

Supplementary Fig. 6 Continued.



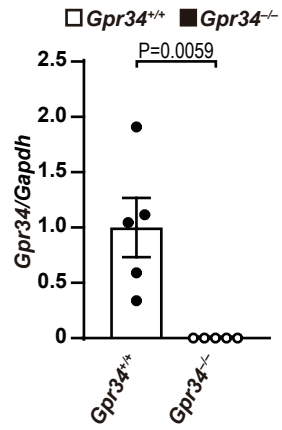

**Supplementary Fig. 8: Expression level of *Gpr34* mRNA in GPR34-deficient mice.**

Expression level of *Gpr34* mRNAs in *Gpr34*<sup>+/+</sup> and *Gpr34*<sup>-/-</sup> cardiomyocytes. *n* = 5, biologically independent samples. Data were normalized to the *Gapdh* content. The average value of *Gpr34*-to-*Gapdh* ratio in *Gpr34*<sup>+/+</sup> group was set equal to 1. Open and closed bars indicate *Gpr34*<sup>+/+</sup> and *Gpr34*<sup>-/-</sup>, respectively. Data are expressed as the mean ± SEM. The data were analyzed using two-sided unpaired Student's *t*-test. Source data are provided as a Source Data file.

**Supplementary Table 1. Echocardiographic parameters of *Pla2g6*<sup>-/-</sup> mice.**

|            | <i>Pla2g6</i> <sup>+/+</sup><br>( <i>n</i> = 18) | <i>Pla2g6</i> <sup>-/-</sup><br>( <i>n</i> = 18) | P value |
|------------|--------------------------------------------------|--------------------------------------------------|---------|
| IVSd (mm)  | 0.84 ± 0.02                                      | 0.82 ± 0.02                                      | 0.398   |
| LVIDd (mm) | 2.67 ± 0.06                                      | 2.74 ± 0.07                                      | 0.502   |
| LVIDs (mm) | 1.22 ± 0.06                                      | 1.27 ± 0.06                                      | 0.535   |
| LVPWd (mm) | 0.84 ± 0.03                                      | 0.80 ± 0.03                                      | 0.283   |
| FS (%)     | 54.6 ± 1.3                                       | 53.8 ± 1.3                                       | 0.667   |
| HR (bpm)   | 683 ± 9                                          | 697 ± 8                                          | 0.264   |

IVSd, diastolic interventricle septal wall thickness; LVIDd, diastolic left ventricle internal dimension; LVIDs, systolic left ventricle internal dimension; LVPWd, diastolic left ventricle posterior wall thickness; FS, fractional shortening of left ventricle dimension; HR, heart rate. Two-sided unpaired Student's *t*-test was used. Values represent the mean ± SEM of data. Source data are provided as a Source Data file.

**Supplementary Table 2. Physiological parameters of *Pla2g6*<sup>-/-</sup> mice.**

|                         | <i>Pla2g6</i> <sup>+/+</sup><br>(n = 13) | <i>Pla2g6</i> <sup>-/-</sup><br>(n = 13) | P value |
|-------------------------|------------------------------------------|------------------------------------------|---------|
| Blood pressure (mmHg)   | 85 ± 2                                   | 85 ± 2                                   | 0.758   |
| Body weight (g)         | 24.6 ± 0.7                               | 24.6 ± 0.7                               | 0.985   |
| Tibia length (mm)       | 17.5 ± 0.1                               | 17.6 ± 0.1                               | 0.504   |
| WH/Body weight (mg/g)   | 4.99 ± 0.10                              | 5.14 ± 0.10                              | 0.297   |
| LV/Body weight (mg/g)   | 3.45 ± 0.07                              | 3.49 ± 0.11                              | 0.759   |
| Lung/Body weight (mg/g) | 5.24 ± 0.14                              | 5.34 ± 0.18                              | 0.653   |

WH/Body weight, whole heart weight-to-body weight ratio; LV/Body weight, left ventricle weight-to-body weight ratio; Lung/Body weight, lung weight-to-body weight ratio. Two-sided unpaired Student's *t*-test was used. Values represent the mean ± SEM of data. Source data are provided as a Source Data file.

**Supplementary Table 3. Echocardiographic parameters of *Gpr34*<sup>-/-</sup> mice.**

|            | <i>Gpr34</i> <sup>+/+</sup><br>( <i>n</i> = 18) | <i>Gpr34</i> <sup>-/-</sup><br>( <i>n</i> = 18) | P value |
|------------|-------------------------------------------------|-------------------------------------------------|---------|
| IVSd (mm)  | 0.74 ± 0.02                                     | 0.74 ± 0.02                                     | 0.984   |
| LVIDd (mm) | 3.28 ± 0.05                                     | 3.15 ± 0.05                                     | 0.074   |
| LVIDs (mm) | 1.49 ± 0.03                                     | 1.43 ± 0.02                                     | 0.122   |
| LVPWd (mm) | 0.78 ± 0.02                                     | 0.79 ± 0.04                                     | 0.842   |
| FS (%)     | 54.5 ± 0.77                                     | 54.5 ± 0.56                                     | 0.963   |
| HR (bpm)   | 719 ± 9                                         | 704 ± 10                                        | 0.273   |

IVSd, diastolic interventricle septal wall thickness; LVIDd, diastolic left ventricle internal dimension; LVIDs, systolic left ventricle internal dimension; LVPWd, diastolic left ventricle posterior wall thickness; FS, fractional shortening of left ventricle dimension; HR, heart rate. Two-sided unpaired Student's *t*-test was used. Values represent the mean ± SEM of data. Source data are provided as a Source Data file.

**Supplementary Table 4. Primers for qPCR.**

| Species   | Symbol        | Forward primer sequence   | Reverse primer sequence |
|-----------|---------------|---------------------------|-------------------------|
| Mouse     | <i>Nppa</i>   | TCGTCTTGGCCTTTTGGCT       | TCCAGGTGGTCTAGCAGGTTCT  |
|           | <i>Nppb</i>   | AAGTCCTAGCCAGTCTCCAGA     | GAGCTGTCTCTGGGCCATTTT   |
|           | <i>Colla2</i> | AGGCTGACACGAACTGAGGT      | ATGCACATCAATGTGGAGGA    |
|           | <i>Col3a1</i> | ACAGCAAATTCACCTACACAGT    | CTCATTGCCTTGCCTGTTT     |
|           | <i>Il1b</i>   | CAACCAACAAGTGATATTCTCCATG | GATCCACACTCTCCAGCTGCA   |
|           | <i>Il6</i>    | ACAACCACGGCCTTCCCTACTT    | CACGATTTCCAGAGAACATGTG  |
|           | <i>Tnf</i>    | CTACCTTGTTGCCTCCTCTTT     | GAGCAGAGGTTTCAGTGATGTAG |
|           | <i>Il10</i>   | TATTCTAAGGCTGGCCACACT     | GCTGCTGCAGGAATGATCAT    |
|           | <i>Gpr34</i>  | ATATGCTACAACAGCCCGGA      | GAACCGAAAGGCATGGTAAG    |
| Rat       | <i>Gpr34</i>  | AATATGCCACGACAGCCCGG      | TCGAAAGGCATGATAAGGCACGA |
|           | <i>Gpr132</i> | GCAGGGCACTTGACAGAGCA      | TGGCTGTAACGCTGTGGTGG    |
| Mouse/Rat | <i>Gapdh</i>  | ATGACAACCTTTGTCAAGCTCATT  | GGTCCACCACCCTGTTGCT     |

*Nppa*, Natriuretic peptide type A; *Nppb*, Natriuretic peptide type B; *Colla2*, Collagen, type I, alpha 2; *Col3a1*, Collagen, type III, alpha 1; *Il1b*, Interleukin 1 beta; *Il6*, Interleukin 6; *Tnf*, Tumor necrosis factor; *Il10*, Interleukin 10; *Gpr34*, G protein-coupled receptor 34; *Gpr132*, G protein-coupled receptor 132; *Gapdh*, Glyceraldehyde-3-phosphate dehydrogenase.

## Overall study design

|                        |                                             |                                         |                      |
|------------------------|---------------------------------------------|-----------------------------------------|----------------------|
| Title of the study     | iPLA2beta                                   |                                         |                      |
| Document creation date | 05/31/2023                                  | Corresponding Email                     | kinya.otsu@kcl.ac.uk |
| Principle investigator | Kinya Otsu                                  | Is the workflow targeted or untargeted? | Untargeted           |
| Institution            | National Cerebral and Cardiovascular Center | Clinical                                | No                   |

## Lipid extraction

|                   |                |                                                 |          |
|-------------------|----------------|-------------------------------------------------|----------|
| Extraction method | 1-phase system | 1-phase system                                  | Methanol |
| pH adjustment     | None           | Were internal standards added prior extraction? | Yes      |

## Analytical platform

|                                                                        |               |                                               |                |
|------------------------------------------------------------------------|---------------|-----------------------------------------------|----------------|
| Number of separation dimensions                                        | One dimension | MS type                                       | Q              |
| Separation Type 1                                                      | LC            | MS vendor                                     | Agilent        |
| Separation Mode 1                                                      | NP            | Ion source                                    | ESI            |
| Separation window (1) for lipid analyte selection ( $\pm$ ) in minutes | 0             | MS Level                                      | MS1            |
| RT verified by standard                                                | Yes           | Mass resolution for detected ion at MS1       | Low resolution |
| CCS verified by standard                                               | Yes           | Resolution at MS1                             | Low            |
| Separation of isobaric/isomeric interferece confirmed                  | Yes           | Was/Were additional dimension/techniques used | No             |
| Model for separation prediction                                        | Yes           |                                               |                |

## Quality control

|                |                  |                 |    |
|----------------|------------------|-----------------|----|
| Blanks         | Yes              | Quality control | No |
| Type of Blanks | Extraction blank |                 |    |

## Method qualification and validation

|                                                      |     |                     |      |
|------------------------------------------------------|-----|---------------------|------|
| Method validation                                    | Yes | Precision           | Yes  |
| Lipid recovery                                       | Yes | Accuracy            | Yes  |
| Dynamic quantification range                         | Yes | Guidelines followed | None |
| Limit of quantitation (LOQ)/Limit of detection (LOD) | Yes |                     |      |



## Reporting

|                                                 |                                        |                     |     |
|-------------------------------------------------|----------------------------------------|---------------------|-----|
| Are reported raw data uploaded into repository? | Yes                                    | Raw data upload     | Yes |
| Are metadata available?                         | Yes                                    | Additional comments | -   |
| Summary data                                    | Quantification and identification data |                     |     |

## Sample Descriptions

### iPLA2beta knockout hearts / Mouse / Tissues (e.g., liver, heart, brain)

|                                      |                                            |                                      |          |
|--------------------------------------|--------------------------------------------|--------------------------------------|----------|
| Perfusion                            | Yes                                        | Storage time (month)                 | 6        |
| Provided information                 | Time to freeze (min), Storage time (month) | Additives                            | None     |
| Temperature handling original sample | 4-8 °C                                     | Were samples stored under inert gas? | No       |
| Instant sample preparation           | No                                         | Additional preservation methods      | No       |
| Time to freeze (min)                 | 1                                          | Biobank samples                      | No       |
| Snap freezing in liquid N2           | Yes                                        | Sample homogenization                | Yes      |
| Storage temperature                  | -80 °C                                     | Sample homogenization solvent        | Methanol |

## Lipid Class Descriptions

### 1) LPS[M-H]- / Lipid identification

|                                 |               |                                        |             |
|---------------------------------|---------------|----------------------------------------|-------------|
| Lipid class                     | LPS           | MS2 verified by standard               | Yes         |
| MS Level for identification     | MS1, MS2      | Background check at MS1                | No          |
| Identification level            | Species level | Background check at MS2                | No          |
| Polarity mode                   | Negative      | Check isomer overlap                   | No          |
| Type of negative (precursor)ion | [M-H]-        | Additional dimension/techniques        | -           |
| Fragments for identification    |               | Lipid Identification Software          | Homemade    |
| Fragment name                   |               |                                        |             |
|                                 | -(C3H5NO2,87) |                                        |             |
|                                 | FA1(+O)       |                                        |             |
| Isotope correction at MS1       | No            | Data manipulation                      | Centroiding |
| Isotope correction at MS2       | No            | Nomenclature for intact lipid molecule | No          |
| MS1 verified by standard        | No            | Nomenclature for fragment ions         | N/A         |

## 1) LPS[M-H]- / For additional separation methods/analytical dimension

|                            |    |                  |    |
|----------------------------|----|------------------|----|
| Quantitative               | No | Batch correction | No |
| Normalization to reference | No |                  |    |

## 2) 5-HETE 8-HETE 11-HETE 12-HETE 15-HETE 5,6-EET 11,12-EET 14,15-EET PGE2 PGF2a TXB2 6-keto-PGF1a PGF1a 12,13-diHOME 9,10-diHOME 13-HODE 9-HODE 13-oxo-ODE 9-oxo-ODE 12,13-EpOME 9,10-EpOME 19,20-diHDoPE 17-HDoHE 16-HDoHE 14-HDoHE 13-HDoHE 11-HDoHE 10-HDoHE 8-HDoHE 7-HDoHE 4-HDoHE(MRM)[M-H]- / Lipid identification

|                                 |                                                                                                                                                                                                                                                                                           |                                                       |                                                                                                                                                                 |
|---------------------------------|-------------------------------------------------------------------------------------------------------------------------------------------------------------------------------------------------------------------------------------------------------------------------------------------|-------------------------------------------------------|-----------------------------------------------------------------------------------------------------------------------------------------------------------------|
| Lipid class                     | 5-HETE 8-HETE 11-HETE 12-HETE 15-HETE 5,6-EET 11,12-EET 14,15-EET PGE2 PGF2a TXB2 6-keto-PGF1a PGF1a 12,13-diHOME 9,10-diHOME 13-HODE 9-HODE 13-oxo-ODE 9-oxo-ODE 12,13-EpOME 9,10-EpOME 19,20-diHDoPE 17-HDoHE 16-HDoHE 14-HDoHE 13-HDoHE 11-HDoHE 10-HDoHE 8-HDoHE 7-HDoHE 4-HDoHE(MRM) | Did you presume assumptions for identification?       | No                                                                                                                                                              |
| MS Level for identification     | MS1, MS2                                                                                                                                                                                                                                                                                  | Check isomer overlap                                  | No                                                                                                                                                              |
| Identification level            | Molecular species level                                                                                                                                                                                                                                                                   | RT verified by standard                               | Yes                                                                                                                                                             |
| Polarity mode                   | Negative                                                                                                                                                                                                                                                                                  | Separation of isobaric/isomeric interferece confirmed | Yes                                                                                                                                                             |
| Type of negative (precursor)ion | [M-H]-                                                                                                                                                                                                                                                                                    | Model for separation prediction                       | Yes                                                                                                                                                             |
| Fragments for identification    |                                                                                                                                                                                                                                                                                           | Additional dimension/techniques                       | -                                                                                                                                                               |
| Fragment name                   | MRM( <a href="https://ars.els-cdn.com/content/image/1-s2.0-S2666166721001994-mmc2.xlsx">https://ars.els-cdn.com/content/image/1-s2.0-S2666166721001994-mmc2.xlsx</a> )                                                                                                                    |                                                       |                                                                                                                                                                 |
| Isotope correction at MS1       | No                                                                                                                                                                                                                                                                                        | Lipid Identification Software                         | MRM                                                                                                                                                             |
| Isotope correction at MS2       | No                                                                                                                                                                                                                                                                                        | Data manipulation                                     | Smoothing                                                                                                                                                       |
| MS1 verified by standard        | Yes                                                                                                                                                                                                                                                                                       | Nomenclature for intact lipid molecule                | No                                                                                                                                                              |
| MS2 verified by standard        | Yes                                                                                                                                                                                                                                                                                       | Nomenclature for fragment ions                        | N/A                                                                                                                                                             |
| Background check at MS1         | No                                                                                                                                                                                                                                                                                        | Further identification remarks                        | <a href="https://ars.els-cdn.com/content/image/1-s2.0-S2666166721001994-mmc2.xlsx">https://ars.els-cdn.com/content/image/1-s2.0-S2666166721001994-mmc2.xlsx</a> |
| Background check at MS2         | No                                                                                                                                                                                                                                                                                        |                                                       |                                                                                                                                                                 |

2) 5-HETE 8-HETE 11-HETE 12-HETE 15-HETE 5,6-EET 11,12-EET 14,15-EET PGE2 PGF2a TXB2 6-keto-PGF1a PGF1a 12,13-diHOME 9,10-diHOME 13-HODE 9-HODE 13-oxo-ODE 9-oxo-ODE 12,13-EpOME 9,10-EpOME 19,20-diHDoPE 17-HDoHE 16-HDoHE 14-HDoHE 13-HDoHE 11-HDoHE 10-HDoHE 8-HDoHE 7-HDoHE 4-HDoHE(MRM)[M-H]- / Lipid quantification

|                            |     |                                |                                                                                                                                                                             |
|----------------------------|-----|--------------------------------|-----------------------------------------------------------------------------------------------------------------------------------------------------------------------------|
| Quantitative               | No  | Batch correction               | No                                                                                                                                                                          |
| Normalization to reference | Yes | Further quantification remarks | <a href="https://www.sciencedirect.com/science/article/pii/S2666166721001994?via%3DiHub">https://www.sciencedirect.com/science/article/pii/S2666166721001994?via%3DiHub</a> |

### 3) PS[M-H]- / Lipid identification

|                                 |               |                                        |             |
|---------------------------------|---------------|----------------------------------------|-------------|
| Lipid class                     | PS            | MS2 verified by standard               | Yes         |
| MS Level for identification     | MS1, MS2      | Background check at MS1                | No          |
| Identification level            | Species level | Background check at MS2                | No          |
| Polarity mode                   | Negative      | Check isomer overlap                   | No          |
| Type of negative (precursor)ion | [M-H]-        | Additional dimension/techniques        | -           |
| Fragments for identification    |               | Lipid Identification Software          | Homemade    |
| Fragment name                   |               |                                        |             |
| -FA1(-H)-(C3H5NO2)              |               |                                        |             |
| FA1(+O)                         |               |                                        |             |
| FA2(+O)                         |               |                                        |             |
| -FA2(-H)-(C3H5NO2)              |               |                                        |             |
| -(C3H5NO2,87)                   |               |                                        |             |
| Isotope correction at MS1       | No            | Data manipulation                      | Centroiding |
| Isotope correction at MS2       | No            | Nomenclature for intact lipid molecule | No          |
| MS1 verified by standard        | No            | Nomenclature for fragment ions         | N/A         |

### 3) PS[M-H]- / For additional separation methods/analytical dimension

|                            |    |                  |    |
|----------------------------|----|------------------|----|
| Quantitative               | No | Batch correction | No |
| Normalization to reference | No |                  |    |

#### 4) PC[M+CH3COO]- / Lipid identification

|                                 |               |                                        |             |
|---------------------------------|---------------|----------------------------------------|-------------|
| Lipid class                     | PC            | MS2 verified by standard               | Yes         |
| MS Level for identification     | MS1, MS2      | Background check at MS1                | No          |
| Identification level            | Species level | Background check at MS2                | No          |
| Polarity mode                   | Negative      | Check isomer overlap                   | No          |
| Type of negative (precursor)ion | [M+CH3COO]-   | Additional dimension/techniques        | -           |
| Fragments for identification    |               | Lipid Identification Software          | Homemade    |
| Fragment name                   |               |                                        |             |
| -FA1(+HO)-(CH3+CH3COO)          |               |                                        |             |
| FA1(+O)                         |               |                                        |             |
| FA2(+O)                         |               |                                        |             |
| -FA2(+HO)-(CH3+CH3COO)          |               |                                        |             |
| -(CH3+CH3COO)                   |               |                                        |             |
| Isotope correction at MS1       | No            | Data manipulation                      | Centroiding |
| Isotope correction at MS2       | No            | Nomenclature for intact lipid molecule | No          |
| MS1 verified by standard        | No            | Nomenclature for fragment ions         | N/A         |

#### 4) PC[M+CH3COO]- / For additional separation methods/analytical dimension

|                            |    |                  |    |
|----------------------------|----|------------------|----|
| Quantitative               | No | Batch correction | No |
| Normalization to reference | No |                  |    |

#### 5) PI[M-H]- / Lipid identification

|                                 |               |                                        |             |
|---------------------------------|---------------|----------------------------------------|-------------|
| Lipid class                     | PI            | MS2 verified by standard               | Yes         |
| MS Level for identification     | MS1, MS2      | Background check at MS1                | No          |
| Identification level            | Species level | Background check at MS2                | No          |
| Polarity mode                   | Negative      | Check isomer overlap                   | No          |
| Type of negative (precursor)ion | [M-H]-        | Additional dimension/techniques        | -           |
| Fragments for identification    |               | Lipid Identification Software          | Homemade    |
| Fragment name                   |               |                                        |             |
| FA1(+O)                         |               |                                        |             |
| FA2(+O)                         |               |                                        |             |
| -FA1(+HO)                       |               |                                        |             |
| -FA1(-H)                        |               |                                        |             |
| -FA2(+HO)                       |               |                                        |             |
| -FA2(-H)                        |               |                                        |             |
| HG(PI,241)                      |               |                                        |             |
| Isotope correction at MS1       | No            | Data manipulation                      | Centroiding |
| Isotope correction at MS2       | No            | Nomenclature for intact lipid molecule | No          |
| MS1 verified by standard        | No            | Nomenclature for fragment ions         | N/A         |

### 5) PI[M-H]- / For additional separation methods/analytical dimension

|                            |    |                  |    |
|----------------------------|----|------------------|----|
| Quantitative               | No | Batch correction | No |
| Normalization to reference | No |                  |    |

### 6) PG[M-H]- / Lipid identification

|                                 |               |                                        |             |
|---------------------------------|---------------|----------------------------------------|-------------|
| Lipid class                     | PG            | MS2 verified by standard               | Yes         |
| MS Level for identification     | MS1, MS2      | Background check at MS1                | No          |
| Identification level            | Species level | Background check at MS2                | No          |
| Polarity mode                   | Negative      | Check isomer overlap                   | No          |
| Type of negative (precursor)ion | [M-H]-        | Additional dimension/techniques        | -           |
| Fragments for identification    |               | Lipid Identification Software          | Homemade    |
| Fragment name                   |               |                                        |             |
| FA1(+O)                         |               |                                        |             |
| FA2(+O)                         |               |                                        |             |
| -FA1(+HO)                       |               |                                        |             |
| -FA2(+HO)                       |               |                                        |             |
| GP(153)                         |               |                                        |             |
| HG(PG,227)                      |               |                                        |             |
| Isotope correction at MS1       | No            | Data manipulation                      | Centroiding |
| Isotope correction at MS2       | No            | Nomenclature for intact lipid molecule | No          |
| MS1 verified by standard        | No            | Nomenclature for fragment ions         | N/A         |

### 6) PG[M-H]- / For additional separation methods/analytical dimension

|                            |    |                  |    |
|----------------------------|----|------------------|----|
| Quantitative               | No | Batch correction | No |
| Normalization to reference | No |                  |    |

## 7) BMP[M-H]- / Lipid identification

|                                 |               |                                        |             |
|---------------------------------|---------------|----------------------------------------|-------------|
| Lipid class                     | BMP           | MS2 verified by standard               | Yes         |
| MS Level for identification     | MS1, MS2      | Background check at MS1                | No          |
| Identification level            | Species level | Background check at MS2                | No          |
| Polarity mode                   | Negative      | Check isomer overlap                   | No          |
| Type of negative (precursor)ion | [M-H]-        | Additional dimension/techniques        | -           |
| Fragments for identification    |               | Lipid Identification Software          | Homemade    |
| Fragment name                   |               |                                        |             |
| FA1(+O)                         |               |                                        |             |
| FA2(+O)                         |               |                                        |             |
| -FA1(+HO)                       |               |                                        |             |
| -FA2(+HO)                       |               |                                        |             |
| GP(153)                         |               |                                        |             |
| HG(GPG,227)                     |               |                                        |             |
| Isotope correction at MS1       | No            | Data manipulation                      | Centroiding |
| Isotope correction at MS2       | No            | Nomenclature for intact lipid molecule | No          |
| MS1 verified by standard        | No            | Nomenclature for fragment ions         | N/A         |

## 7) BMP[M-H]- / For additional separation methods/analytical dimension

|                            |    |                  |    |
|----------------------------|----|------------------|----|
| Quantitative               | No | Batch correction | No |
| Normalization to reference | No |                  |    |

## 8) PE P[M-H]- / Lipid identification

|                                 |               |                                        |             |
|---------------------------------|---------------|----------------------------------------|-------------|
| Lipid class                     | PE P          | MS2 verified by standard               | Yes         |
| MS Level for identification     | MS1, MS2      | Background check at MS1                | No          |
| Identification level            | Species level | Background check at MS2                | No          |
| Polarity mode                   | Negative      | Check isomer overlap                   | No          |
| Type of negative (precursor)ion | [M-H]-        | Additional dimension/techniques        | -           |
| Fragments for identification    |               | Lipid Identification Software          | Homemade    |
| Fragment name                   |               |                                        |             |
| FA2(+O)                         |               |                                        |             |
| -FA2(+HO)                       |               |                                        |             |
| HG(PE,196)                      |               |                                        |             |
| FA O-[xx:x]                     |               |                                        |             |
| Isotope correction at MS1       | No            | Data manipulation                      | Centroiding |
| Isotope correction at MS2       | No            | Nomenclature for intact lipid molecule | No          |
| MS1 verified by standard        | No            | Nomenclature for fragment ions         | N/A         |

## 8) PE P[M-H]- / For additional separation methods/analytical dimension

|                            |    |                  |    |
|----------------------------|----|------------------|----|
| Quantitative               | No | Batch correction | No |
| Normalization to reference | No |                  |    |

## 9) FA[M-H]- / Lipid identification

|                                 |               |                                        |             |
|---------------------------------|---------------|----------------------------------------|-------------|
| Lipid class                     | FA            | Background check at MS1                | No          |
| MS Level for identification     | MS1           | Check isomer overlap                   | No          |
| Identification level            | Species level | Additional dimension/techniques        | -           |
| Polarity mode                   | Negative      | Lipid Identification Software          | Homemade    |
| Type of negative (precursor)ion | [M-H]-        | Data manipulation                      | Centroiding |
| Isotope correction at MS1       | No            | Nomenclature for intact lipid molecule | No          |
| MS1 verified by standard        | No            |                                        |             |

## 9) FA[M-H]- / For additional separation methods/analytical dimension

|                            |    |                  |    |
|----------------------------|----|------------------|----|
| Quantitative               | No | Batch correction | No |
| Normalization to reference | No |                  |    |

## 10) BMP(Pos reference)[M+NH4]+ / Lipid identification

|                                 |                    |                                        |             |
|---------------------------------|--------------------|----------------------------------------|-------------|
| Lipid class                     | BMP(Pos reference) | MS2 verified by standard               | Yes         |
| MS Level for identification     | MS1, MS2           | Background check at MS1                | No          |
| Identification level            | Species level      | Background check at MS2                | No          |
| Polarity mode                   | Positive           | Check isomer overlap                   | No          |
| Type of positive (precursor)ion | [M+NH4]+           | Additional dimension/techniques        | -           |
| Fragments for identification    |                    | Lipid Identification Software          | Homemade    |
| Fragment name                   |                    |                                        |             |
| FA1(+C3H4O)                     |                    |                                        |             |
| FA2(+C3H4O)                     |                    |                                        |             |
| Isotope correction at MS1       | No                 | Data manipulation                      | Centroiding |
| Isotope correction at MS2       | No                 | Nomenclature for intact lipid molecule | No          |
| MS1 verified by standard        | No                 | Nomenclature for fragment ions         | N/A         |

## 10) BMP(Pos reference)[M+NH4]+ / For additional separation methods/analytical dimension

|                            |    |                  |    |
|----------------------------|----|------------------|----|
| Quantitative               | No | Batch correction | No |
| Normalization to reference | No |                  |    |

## 11) PG(Pos reference)[M+NH4]<sup>+</sup> / Lipid identification

|                                 |                      |                                        |             |
|---------------------------------|----------------------|----------------------------------------|-------------|
| Lipid class                     | PG(Pos reference)    | MS2 verified by standard               | Yes         |
| MS Level for identification     | MS1, MS2             | Background check at MS1                | No          |
| Identification level            | Species level        | Background check at MS2                | No          |
| Polarity mode                   | Positive             | Check isomer overlap                   | No          |
| Type of positive (precursor)ion | [M+NH4] <sup>+</sup> | Additional dimension/techniques        | -           |
| Fragments for identification    |                      | Lipid Identification Software          | Homemade    |
| Fragment name                   |                      |                                        |             |
| -HG(PG,172)                     |                      |                                        |             |
| FA1(+C3H4O)                     |                      |                                        |             |
| FA2(+C3H4O)                     |                      |                                        |             |
| Isotope correction at MS1       | No                   | Data manipulation                      | Centroiding |
| Isotope correction at MS2       | No                   | Nomenclature for intact lipid molecule | No          |
| MS1 verified by standard        | No                   | Nomenclature for fragment ions         | N/A         |

## 11) PG(Pos reference)[M+NH4]<sup>+</sup> / For additional separation methods/analytical dimension

|                            |    |                  |    |
|----------------------------|----|------------------|----|
| Quantitative               | No | Batch correction | No |
| Normalization to reference | No |                  |    |



Supplementary figure 1b

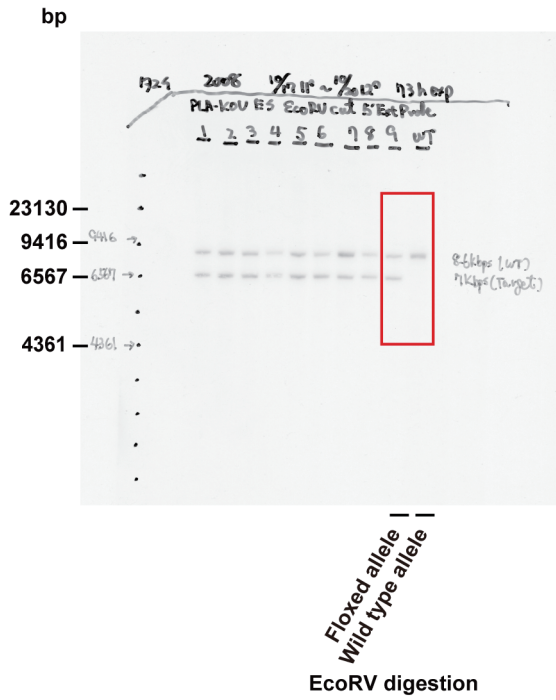

Supplementary figure 1c

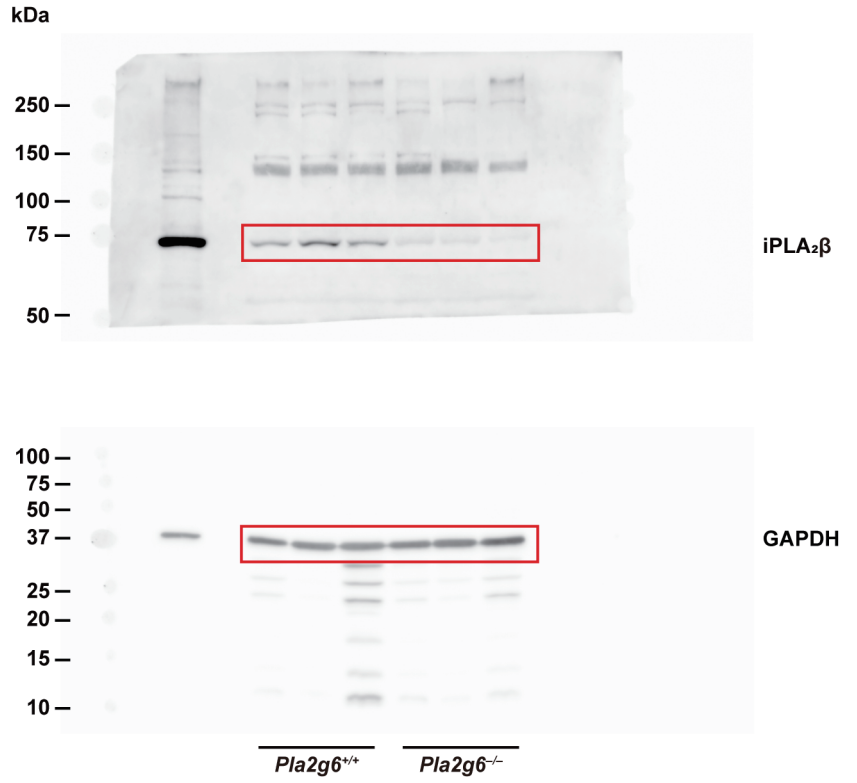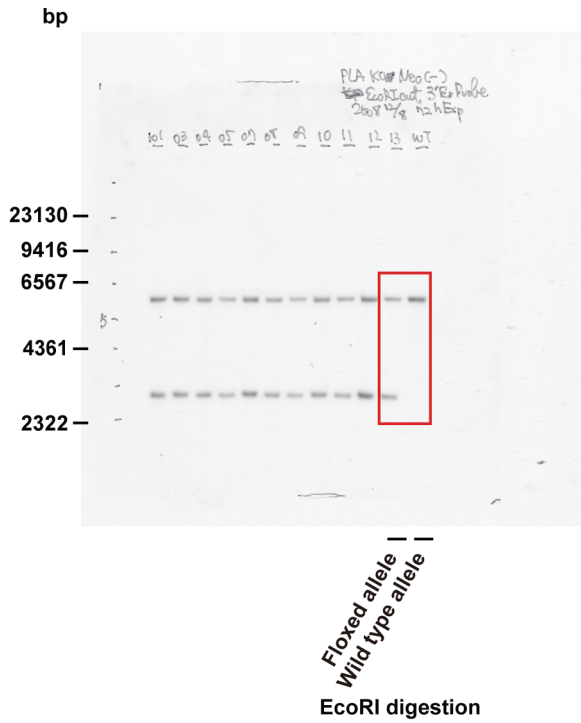

Uncropped scans of blots in supplementary figures.

Red squares show the part of cropped area.

Supplementary figure 1d

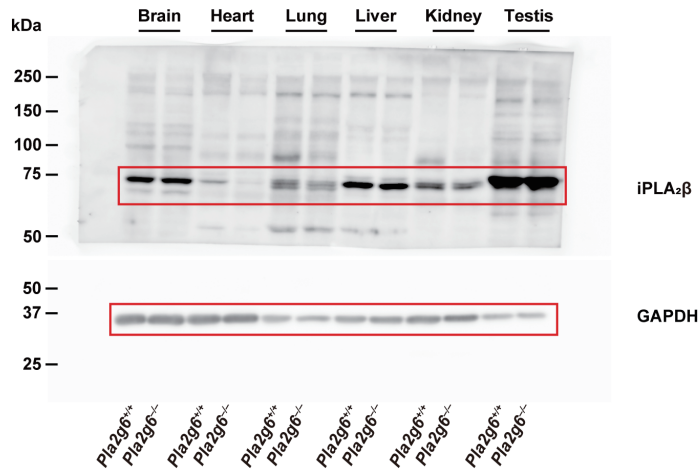

Supplementary figure 1e

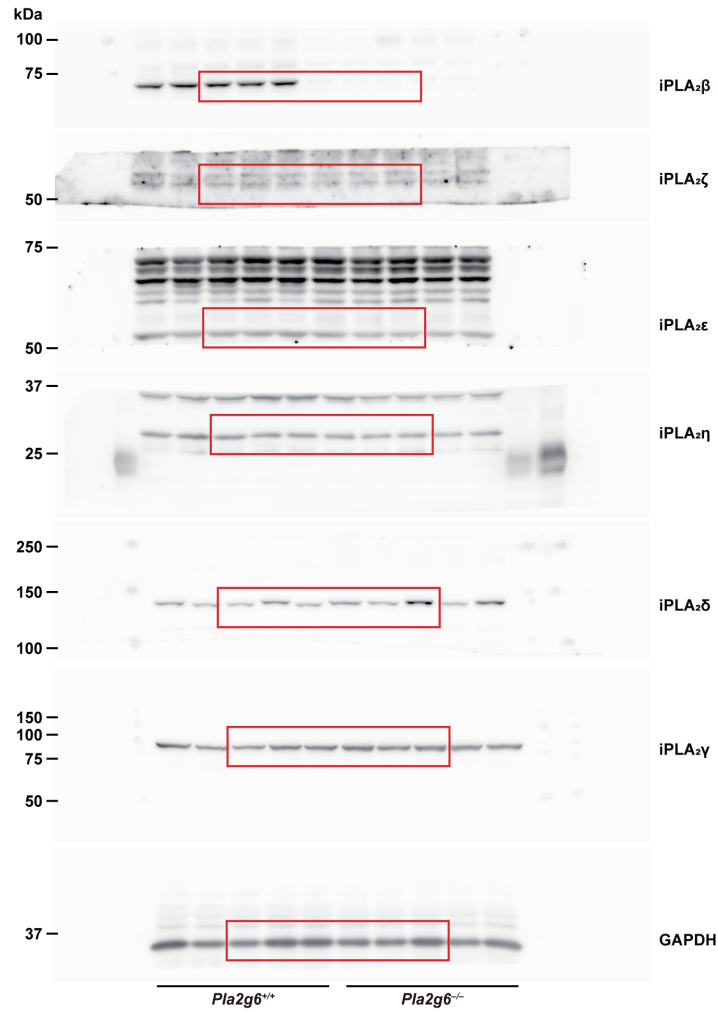

Supplementary figure 1f

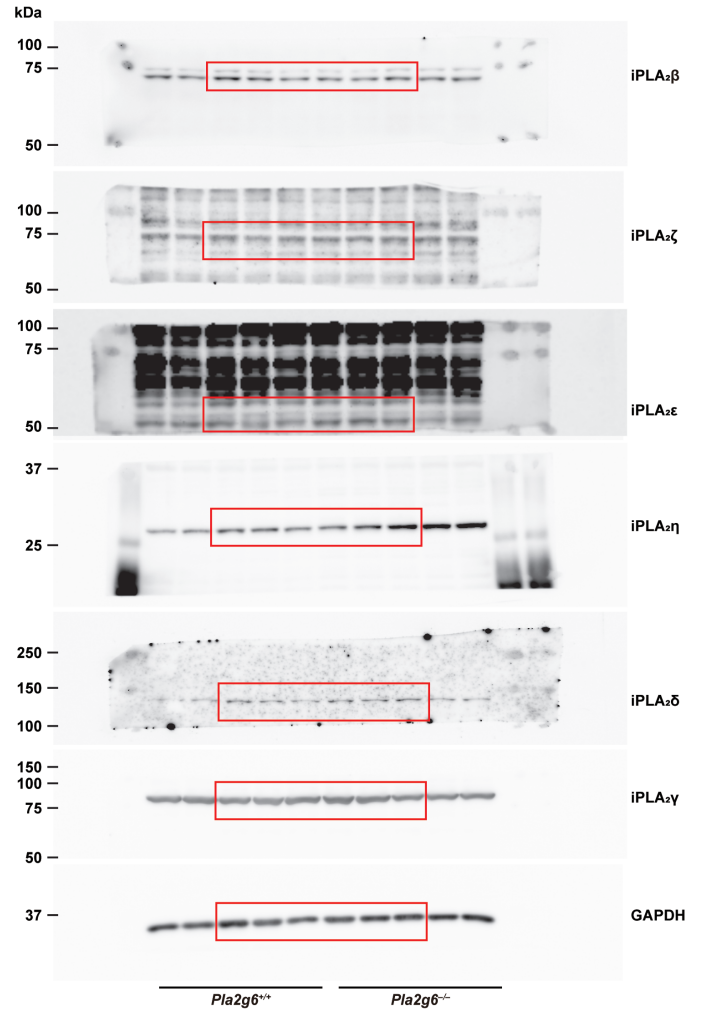

Uncropped scans of blots in supplementary figures. (Continued)

Supplementary figure 2a

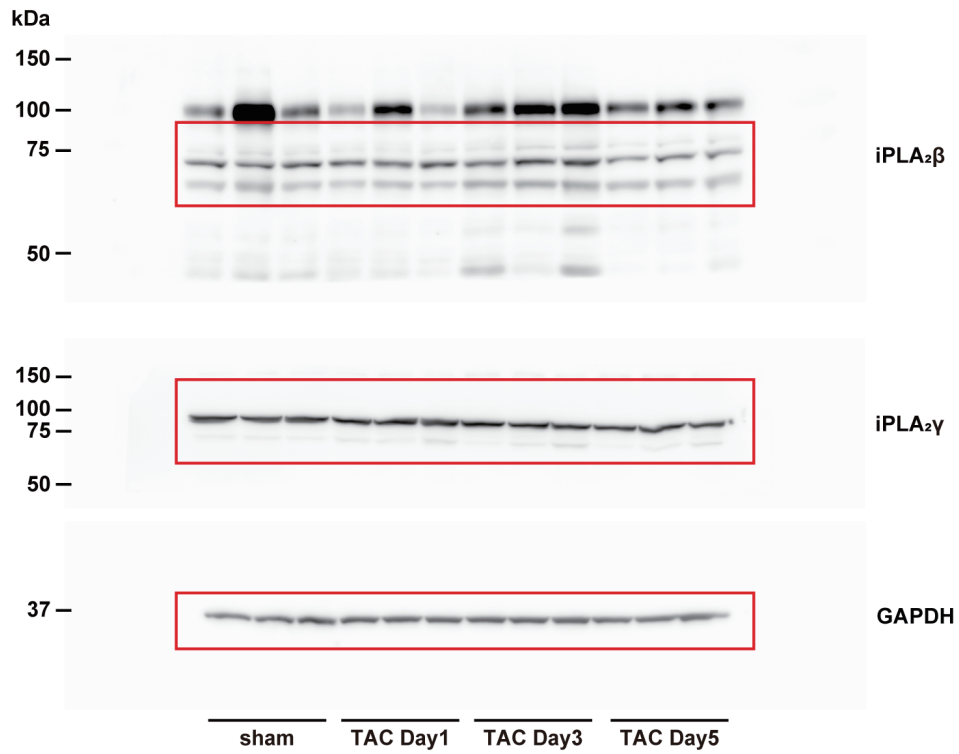

Supplementary figure 2b

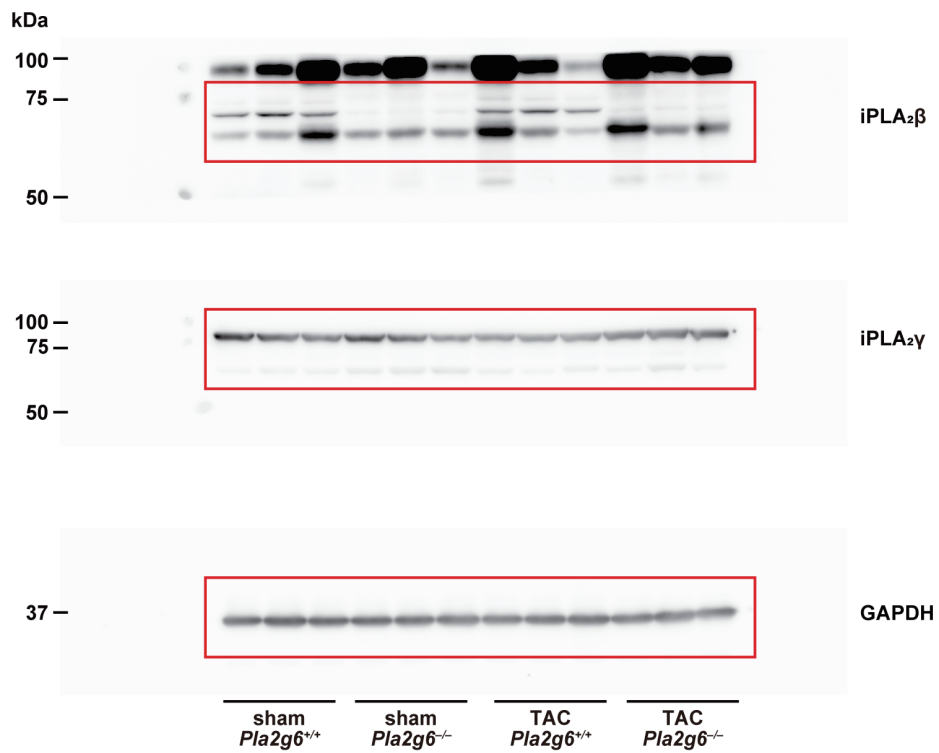

Uncropped scans of blots in supplementary figures. (Continued)

Supplementary figure 7a

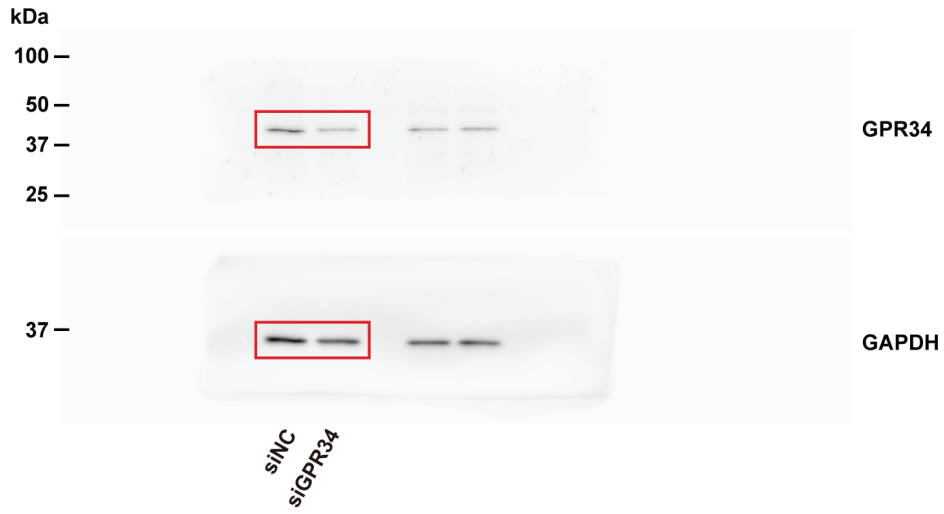

Supplementary figure 7b

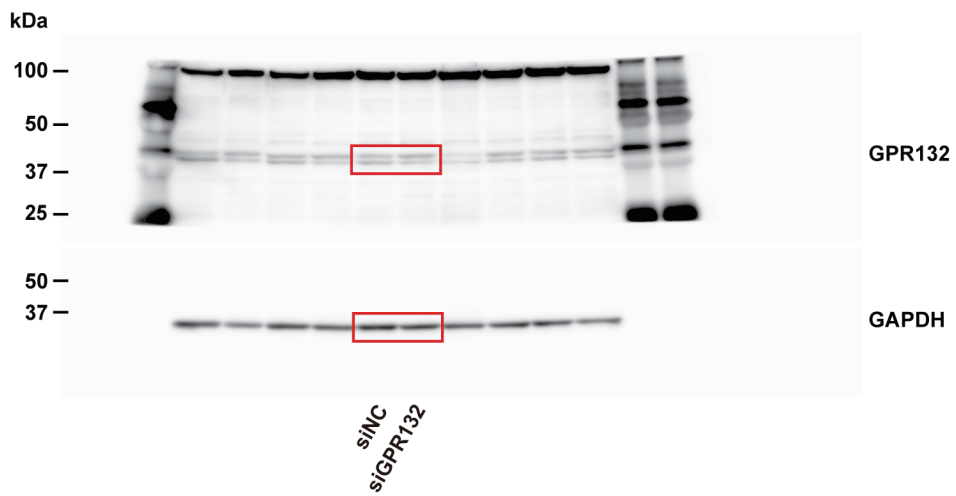

Uncropped scans of blots in supplementary figures. (Continued)

Supplementary figure 7e

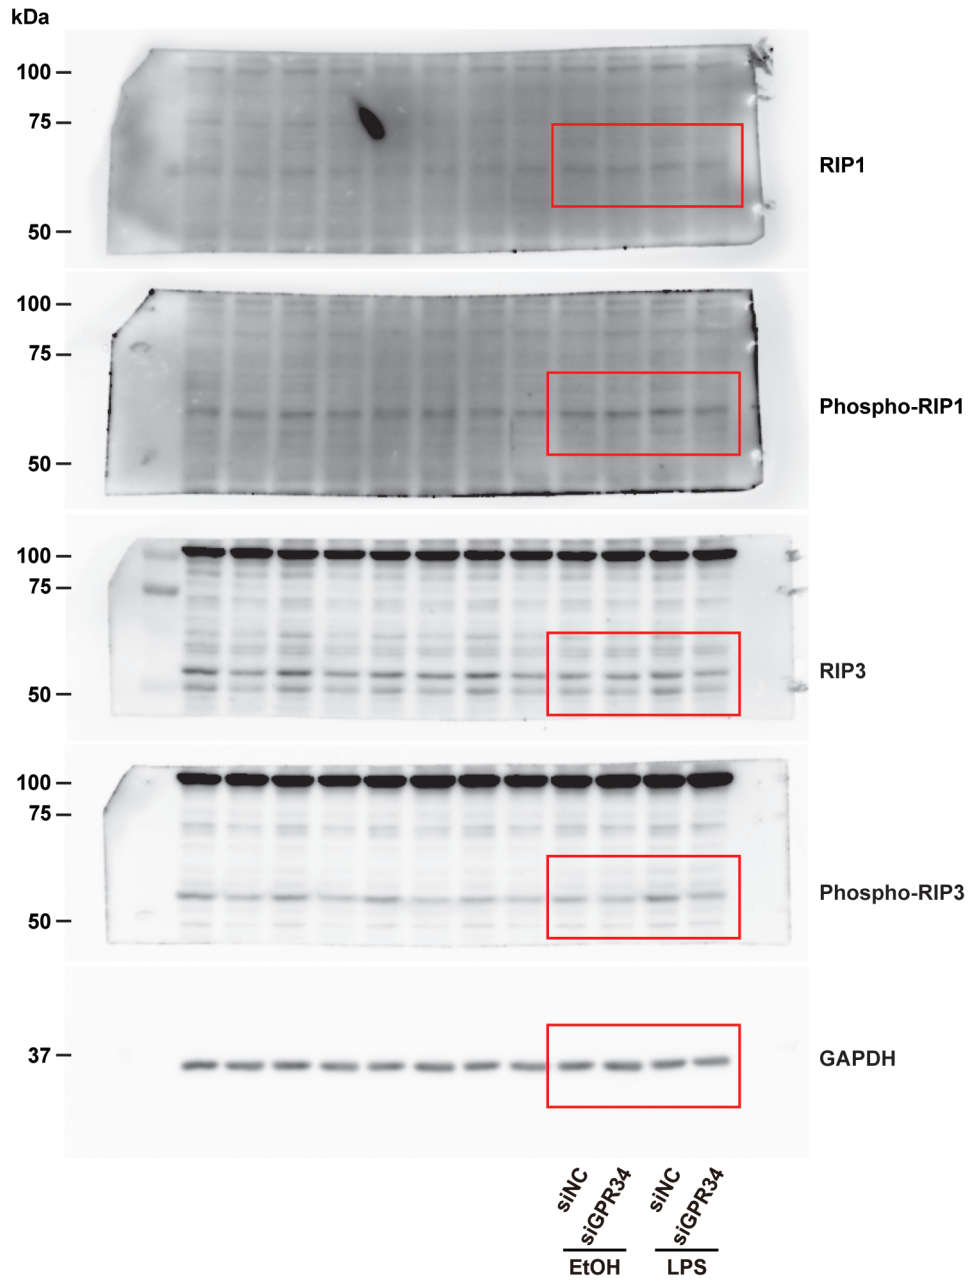

Uncropped scans of blots in supplementary figures. (Continued)
