# Supplementary material for: Lysophosphatidylserine induces necrosis in pressure overloaded male mouse hearts via G protein coupled receptor 34
Source: PubMed Central journal article supplement (PMC10390482; doi:10.1038/s41467-023-40201-4), 2023-07-31
Supplement: 41467_2023_40201_MOESM2_ESM.pdf [file 41467_2023_40201_MOESM2_ESM.pdf]

## Reporting Summary

Nature Portfolio wishes to improve the reproducibility of the work that we publish. This form provides structure for consistency and transparency in reporting. For further information on Nature Portfolio policies, see our [Editorial Policies](#) and the [Editorial Policy Checklist](#).

### Statistics

For all statistical analyses, confirm that the following items are present in the figure legend, table legend, main text, or Methods section.

n/a Confirmed

- The exact sample size ( $n$ ) for each experimental group/condition, given as a discrete number and unit of measurement
- A statement on whether measurements were taken from distinct samples or whether the same sample was measured repeatedly
- The statistical test(s) used AND whether they are one- or two-sided  
*Only common tests should be described solely by name; describe more complex techniques in the Methods section.*
- A description of all covariates tested
- A description of any assumptions or corrections, such as tests of normality and adjustment for multiple comparisons
- A full description of the statistical parameters including central tendency (e.g. means) or other basic estimates (e.g. regression coefficient) AND variation (e.g. standard deviation) or associated estimates of uncertainty (e.g. confidence intervals)
- For null hypothesis testing, the test statistic (e.g.  $F$ ,  $t$ ,  $r$ ) with confidence intervals, effect sizes, degrees of freedom and  $P$  value noted  
*Give  $P$  values as exact values whenever suitable.*
- For Bayesian analysis, information on the choice of priors and Markov chain Monte Carlo settings
- For hierarchical and complex designs, identification of the appropriate level for tests and full reporting of outcomes
- Estimates of effect sizes (e.g. Cohen's  $d$ , Pearson's  $r$ ), indicating how they were calculated

*Our web collection on [statistics for biologists](#) contains articles on many of the points above.*

### Software and code

Policy information about [availability of computer code](#)

#### Data collection

Echocardiogram : SONOS-4500 (Philips Medical Systems)  
 Blood pressure: Model MK-2000 (Muromachi Kikai)  
 qRT-PCR data collection: QuantStudio 7 Flex (Applied Biosystems)  
 IHC-image scan: BZX710 (Keyence), BZX810 (Keyence), or FV-1000D (Olympus)  
 Cell viability and cAMP assay: SH-9000lab (Hitachi High-Tech Science Corporation)  
 Western Blot analysis: ImageQuant LAS4000mini (Cytiva)  
 Lipidomics analysis: Analyst TF v1.8.1 and Analyst Software v1.6 (SCIEX)

#### Data analysis

Plots and statistics: Graphpadprism v8.4.3 (GraphPad Software)  
 Quantification of qRT-PCR data: QuantStudio Realtime PCR software v1.3 (Applied Biosystems)  
 IHC-image quantification analysis: ImageJ v1.51j8 (National Institutes of Health)  
 Western Blot analysis: ImageQuantTL v7.0 (Cytiva)  
 Lipidomics analysis: MultiQuant software v2.0 (SCIEX), SCIEX MS data converter v1.3 beta (SCIEX) and 2DICAL v0.91 (Mitsui Knowledge Industry)

For manuscripts utilizing custom algorithms or software that are central to the research but not yet described in published literature, software must be made available to editors and reviewers. We strongly encourage code deposition in a community repository (e.g. GitHub). See the Nature Portfolio [guidelines for submitting code & software](#) for further information.

## Data

Policy information about [availability of data](#)

All manuscripts must include a [data availability statement](#). This statement should provide the following information, where applicable:

- Accession codes, unique identifiers, or web links for publicly available datasets
- A description of any restrictions on data availability
- For clinical datasets or third party data, please ensure that the statement adheres to our [policy](#)

All data supporting the findings of this study are available within the article and its Supplementary Information files. Lipidomics raw data are also available from an online resource, MetaboBank (<https://mb2.ddbj.nig.ac.jp/study/MTBKS202.html>). Source data are provided with this manuscript.

## Research involving human participants, their data, or biological material

Policy information about studies with [human participants or human data](#). See also policy information about [sex, gender \(identity/presentation\), and sexual orientation](#) and [race, ethnicity and racism](#).

Reporting on sex and gender

Reporting on race, ethnicity, or other socially relevant groupings

Population characteristics

Recruitment

Ethics oversight

Note that full information on the approval of the study protocol must also be provided in the manuscript.

## Field-specific reporting

Please select the one below that is the best fit for your research. If you are not sure, read the appropriate sections before making your selection.

Life sciences  Behavioural & social sciences  Ecological, evolutionary & environmental sciences

For a reference copy of the document with all sections, see [nature.com/documents/nr-reporting-summary-flat.pdf](https://nature.com/documents/nr-reporting-summary-flat.pdf)

## Life sciences study design

All studies must disclose on these points even when the disclosure is negative.

Sample size

Data exclusions

Replication

Randomization

Blinding

## Reporting for specific materials, systems and methods

## Materials & experimental systems

## Methods

| n/a                                 | Involved in the study                                           |
|-------------------------------------|-----------------------------------------------------------------|
| <input type="checkbox"/>            | <input checked="" type="checkbox"/> Antibodies                  |
| <input checked="" type="checkbox"/> | <input type="checkbox"/> Eukaryotic cell lines                  |
| <input checked="" type="checkbox"/> | <input type="checkbox"/> Palaeontology and archaeology          |
| <input type="checkbox"/>            | <input checked="" type="checkbox"/> Animals and other organisms |
| <input checked="" type="checkbox"/> | <input type="checkbox"/> Clinical data                          |
| <input checked="" type="checkbox"/> | <input type="checkbox"/> Dual use research of concern           |
| <input checked="" type="checkbox"/> | <input type="checkbox"/> Plants                                 |

| n/a                                 | Involved in the study                           |
|-------------------------------------|-------------------------------------------------|
| <input checked="" type="checkbox"/> | <input type="checkbox"/> ChIP-seq               |
| <input checked="" type="checkbox"/> | <input type="checkbox"/> Flow cytometry         |
| <input checked="" type="checkbox"/> | <input type="checkbox"/> MRI-based neuroimaging |

## Antibodies

### Antibodies used

Western blotting  
 Primary antibodies;  
 Anti-iPLA2 $\beta$ , Santa Cruz Biotechnology, sc376563, Product Clone Name; D-4 (1:100 dilution)  
 Anti-GAPDH, FUJIFILM Wako Pure Chemical Corporation, 016-25523, Product Clone Name; 5A12 (1:1000 dilution)  
 Anti-iPLA2 $\zeta$ , Abnova, MAB3210, Product Clone Name; AT2G2 (1:1000 dilution)  
 Anti-iPLA2 $\epsilon$ , Everest biotech, EB08402 (1:1000 dilution)  
 Anti-iPLA2 $\eta$ , Protein tech, 25469-1-AP (1:500 dilution)  
 Anti-iPLA2 $\delta$ , Nobus bio, NBP1-74214 (1:500 dilution)  
 Anti-iPLA2 $\gamma$ , Thermo Fisher Scientific, PA5-49993 (1:1000 dilution)  
 Anti-GPR34, Thermo Fisher Scientific, PA5-45717 (1:1000 dilution)  
 Anti-GPR132, Protein tech, 17026-1-AP (1:1000 dilution)  
 Anti-RIP1, Cell Signaling Technology, #3493, Product Clone Name;D94C12 (1:1000 dilution)  
 Anti-Phospho-RIP1, Cell Signaling Technology, #31122 (1:1000 dilution)  
 Anti-RIP3, Nobus bio, NBP1-77299 (1:1000 dilution)  
 Anti-Phospho-RIP3, Abcam, ab195117, Product Clone Name; EPR9516(N)-25 (1:1000 dilution)  
 Secondary antibodies;  
 Anti-Mouse IgG HRP Linked Whole Ab, Cytiva, NA931 (1:10000 dilution)  
 Anti-Rabbit IgG HRP Linked Whole Ab, Cytiva, NA934 (1:10000 dilution)  
 Immunohistochemistry:  
 Anti-CD45, Biolegend, 103101, Product Clone Name; 30-F11 (1:100 dilution)  
 Anti-CD68, Bio-Rad, MCA1957T, Product Clone Name; FA-11 (1:100 dilution)  
 Anti-Ly-6G/Ly-6C, BD Pharmacy, 550291, Product Clone Name; RB6-8C5 (1:100 dilution)  
 Anti-CD3, Abcam, ab16669, Product Clone Name; SP7 (1:100 dilution)  
 Anti-HMGB1, Abcam, ab18256 (1:100 dilution)  
 Anti- $\alpha$ -sarcomeric actin, Thermo Fisher Scientific, A2172, Product Clone Name; 5C5 (1:500 dilution)  
 Secondary antibodies;  
 Anti-Rat IgG (H+L), Biotinylated Ab, Vector Laboratory, BA-4001 (1:200 dilution)  
 Anti-Rabbit IgG (H+L), Biotinylated Ab, Vector Laboratory, BA-1000 (1:200 dilution)  
 Anti-Rabbit IgG (H+L), Alexa Fluor™ 488 conjugated Ab, Invitrogen, A11034 (1:100 dilution)  
 Anti-Mouse IgM, Texas Red® conjugated Ab, Vector Laboratory, TI2020 (1:10 dilution)

### Validation

All antibodies in this study were commercially purchased and have been validated by the vendors for species and application. Validation data are available from the respective vendor's respective websites.

Anti-iPLA2 $\beta$ ; [https://www.scbt.com/p/group-vi-ipla2-antibody-d-4?productCanUrl=group-vi-ipla2-antibody-d-4&\\_requestid=2462021](https://www.scbt.com/p/group-vi-ipla2-antibody-d-4?productCanUrl=group-vi-ipla2-antibody-d-4&_requestid=2462021)  
 Species specificity: Mouse, Rat, Human  
 Applications: Western blotting, Immunoprecipitation, Immunofluorescence, Enzyme-linked immuno-sorbent assay

Anti-GAPDH; <https://labchem-wako.fujifilm.com/us/product/detail/W01W0101-2552.html>  
 Species specificity: Human, African Green Monkey  
 Applications: Western blotting, Immunoprecipitation

Anti-iPLA2 $\zeta$ ; [https://www.abnova.com/products/products\\_detail.asp?catalog\\_id=MAB3210](https://www.abnova.com/products/products_detail.asp?catalog_id=MAB3210)  
 Species specificity: Human, Mouse  
 Applications: Enzyme-linked immuno-sorbent assay, Immunohistochemistry, Western blotting

Anti-iPLA2 $\epsilon$ ; <https://everestbiotech.com/product/goat-anti-pnpla3-adiponutrin-antibody/>  
 Species specificity: Human, Mouse, Rat  
 Applications: Enzyme-linked immuno-sorbent assay, Immunohistochemistry, Western blotting

Anti-iPLA2 $\eta$ ; <https://www.ptglab.co.jp/products/PNPLA4-Antibody-25469-1-AP.htm>  
 Species specificity: Human, Mouse  
 Applications: Western blotting, Immunoprecipitation, Enzyme-linked immuno-sorbent assay

Anti-iPLA2 $\delta$ ; [https://www.novusbio.com/products/pnpla6-antibody\\_nbp1-74214](https://www.novusbio.com/products/pnpla6-antibody_nbp1-74214)

Species specificity: Mouse  
Applications: Western blotting

Anti-iPLA2y; <https://www.thermofisher.com/antibody/product/PNPLA8-Antibody-Polyclonal/PA5-49993>  
Species specificity: Human, Mouse  
Applications: Western blotting

Anti-GPR34; <https://www.thermofisher.com/antibody/product/GPR34-Antibody-Polyclonal/PA5-45717>  
Species specificity: Human, Mouse  
Applications: Western blotting

Anti-GPR132; <https://www.ptglab.co.jp/products/GPR132-Antibody-17026-1-AP.htm>  
Species specificity: Human, Mouse, Rat  
Applications: Enzyme-linked immuno-sorbent assay, Immunohistochemistry, Western blotting

Anti-RIP1; <https://www.cellsignal.jp/products/primary-antibodies/rip-d94c12-xp-rabbit-mab/3493>  
Species specificity: Human, Mouse, Rat, Hamster, Monkey  
Applications: Western blotting, Immunoprecipitation, Immunofluorescence, Immunohistochemistry, Flow Cytometer

Anti-Phospho-RIP1; <https://www.cellsignal.jp/products/primary-antibodies/phospho-rip-ser166-antibody/31122>  
Species specificity: Mouse  
Applications: Western blotting

Anti-RIP3; [https://www.novusbio.com/products/rip3-rip3-antibody\\_nbp1-77299#reviews-publications](https://www.novusbio.com/products/rip3-rip3-antibody_nbp1-77299#reviews-publications)  
Species specificity: Human, Mouse, Rat  
Applications: Western Blot, Enzyme-linked immuno-sorbent assay, Immunocytochemistry, Immunofluorescence, Immunohistochemistry, Immunoprecipitation, Gel Supershift Assay

Anti-Phospho-RIP3; <https://www.abcam.co.jp/products/primary-antibodies/rip3-phospho-s232-antibody-epr9516n-25-ab195117.html>  
Species specificity: Mouse  
Applications: Enzyme-linked immuno-sorbent assay, Western Blotting, Dot blot

Immunohistochemistry:  
Anti-CD45; <https://www.biolegend.com/ja-jp/products/purified-anti-mouse-cd45-antibody-102?GroupID=BLG1932>  
Species specificity: Mouse  
Applications: Flow Cytometer, Mass Cytometry, Immunohistochemistry, Immunoprecipitation, Western blotting, Complement Mediated Cell Depletion

Anti-CD68; [https://www.bio-rad-antibodies.com/monoclonal/mouse-cd68-antibody-fa-11-mca1957.html?f=purified&JSESSIONID\\_STERLING=F3483C1D473E9F509EF33E1DC09EF821.ecommerce2&evCntryLang=JP-ja&cntry=JP&thirdPartyCookieEnabled=true](https://www.bio-rad-antibodies.com/monoclonal/mouse-cd68-antibody-fa-11-mca1957.html?f=purified&JSESSIONID_STERLING=F3483C1D473E9F509EF33E1DC09EF821.ecommerce2&evCntryLang=JP-ja&cntry=JP&thirdPartyCookieEnabled=true)  
Species specificity: Mouse  
Applications: Flow Cytometer, Immunohistochemistry, Immunoprecipitation, Immunofluorescence, Western blotting

Anti-Ly-6G/Ly-6C; <https://www.bdbiosciences.com/ja-jp/products/reagents/microscopy-imaging-reagents/immunohistochemistry-reagents/purified-rat-anti-mouse-ly-6g-and-ly-6c.550291>  
Species specificity: Mouse  
Applications: Flow Cytometer, Immunohistochemistry

Anti-CD3; <https://www.abcam.co.jp/products/primary-antibodies/cd3-antibody-sp7-ab16669.html>  
Species specificity: Mouse, Rat, Human, Sheep, Rabbit, Horse, Chicken, Cow, Cat, Dog, Pig, Baboon, Woodchuck  
Applications: Flow Cytometer, Immunohistochemistry, Western blotting

Anti-HMGB1; <https://www.abcam.co.jp/products/primary-antibodies/hmgb1-antibody-ab18256.html>  
Species specificity: Mouse, Rat, Human, Rabbit, Cow  
Applications: Immunofluorescence, Western blotting

Anti- $\alpha$ -sarcomeric actin; <https://www.sigmaaldrich.com/JP/ja/product/sigma/a2172>  
Species specificity: Rat, Human, Sheep, Rabbit, Carp, Guinea Pig, Snake, Cow, Frog  
Applications: Enzyme-linked immuno-sorbent assay, Immunohistochemistry, Western blotting

## Animals and other research organisms

Policy information about [studies involving animals](#); [ARRIVE guidelines](#) recommended for reporting animal research, and [Sex and Gender in Research](#)

### Laboratory animals

Pla2g6<sup>-/-</sup>, +/+, Gpr34<sup>-/-</sup> mice were generated in our laboratory. C57BL/6JmSlc mice were purchased from SLC. All mice were housed in a temperature and humidity-controlled (23 ± 1.5 °C, 45 ± 15%) room with 12-hr light-dark cycle (lights on from 8:00 to 20:00). The sex and age for all the strains of mice were male and 10 to 14-week-old, respectively. 1-day-old Kwl/Wistar male rats were purchased from Kiwa Laboratory Animals. All rats were used for neonatal rat cardiomyocyte isolation on the day of purchase.

|                         |                                                                                                                                                                                                                                                                                                                                                                                                                                                                                                                                                                                                                                                                   |
|-------------------------|-------------------------------------------------------------------------------------------------------------------------------------------------------------------------------------------------------------------------------------------------------------------------------------------------------------------------------------------------------------------------------------------------------------------------------------------------------------------------------------------------------------------------------------------------------------------------------------------------------------------------------------------------------------------|
| Wild animals            | The study did not involve wild animals.                                                                                                                                                                                                                                                                                                                                                                                                                                                                                                                                                                                                                           |
| Reporting on sex        | Only male mice and rats were used in this study.                                                                                                                                                                                                                                                                                                                                                                                                                                                                                                                                                                                                                  |
| Field-collected samples | This study did not involve samples collected from the field.                                                                                                                                                                                                                                                                                                                                                                                                                                                                                                                                                                                                      |
| Ethics oversight        | All experimental protocols were approved by the Animal Research Committee of Osaka University. All in vivo and in vitro experimental protocols were carried out under the supervision of the Animal Research Committee at Osaka University and in accordance with the Guidelines for Animal Experiments at Osaka University and the Japanese Animal Protection and Management Law. These experiments were performed in accordance with the U.K. Animals (Scientific Procedures) Act 1986 and its associated guidelines, Directive 2010/63/EU for animal experiments. We have complied with ARRIVE (Animal Research: Reporting of In Vivo Experiments) guidelines. |

Note that full information on the approval of the study protocol must also be provided in the manuscript.
